# Supplementary material for: Highly diastereo- and enantioselective NHC-catalyzed [3+2] annulation of enals and isatins
Source: Royal Society of Chemistry journal article supplement (doi:10.1039/c1cc13860j), 2011-01-01
Supplement: c1cc13860j.pdf [file c1cc13860j.pdf]

## Supporting Information

### Highly Diastereo and Enantioselective NHC-Catalyzed [3+2] Annulation of Enals and Isatins

Li-Hui Sun, Li-Tao Shen, and Song Ye\*

Beijing National Laboratory for Molecular Sciences, CAS Key Laboratory of  
Molecular Recognition and Function, Institute of Chemistry, Chinese Academy of  
Sciences, Beijing 100190 (China)

Fax: (+86) 10-6255-4449

E-mail: [songye@iccas.ac.cn](mailto:songye@iccas.ac.cn)

#### Table of Contents

|                                                                                  |    |
|----------------------------------------------------------------------------------|----|
| <b>Part I Experimental part</b> .....                                            | 2  |
| General Information.....                                                         | 2  |
| 1.1 Enantioselective [3 + 2] Annulation of Enals and Isatins catalyzed by NHC .. | 3  |
| 1.2 X-ray crystal structure of (-)- <b>3d</b> .....                              | 11 |
| References.....                                                                  | 12 |
| <b>Part II NMR Spectra</b> .....                                                 | 13 |
| <b>Part III HPLC Spectra</b> .....                                               | 26 |

## Part I Experimental part

### General Information

Unless otherwise indicated, all reactions were carried out under an N<sub>2</sub> atmosphere in oven-dried glassware with magnetic stirring. Anhydrous THF and toluene were distilled from sodium and benzophenone, CH<sub>2</sub>Cl<sub>2</sub> was distilled from CaH<sub>2</sub>. Chiral triazolium salts **4a-4g**,<sup>1a-1d</sup> were synthesized according to our previous reports and the literatures. Isatins and aldehydes were synthesized according to literatures<sup>2,3</sup>. Column chromatograph was performed on silica gel 200~300 mesh. All <sup>1</sup>H NMR (300 MHz), <sup>13</sup>C NMR (75 MHz) spectra were recorded on a Bruker-DMX 300 spectrometer in CDCl<sub>3</sub>, with tetramethylsilane as an internal standard and reported in parts per million (ppm, δ). <sup>1</sup>H NMR Spectroscopy splitting patterns were designated as singlet (s), doublet (d), triplet (t). Splitting patterns that could not be interpreted or easily visualized were designated as multiplet (m) or broad (br). Infrared spectra were recorded on a JASCO FT/IR-480 spectrophotometer and reported as wave number (cm<sup>-1</sup>). Optical rotations were measured on Perkin Elmer/Model-343 digital polarimeter operating at the sodium D line with a 100 mm path cell, and are reported as follows: [α]<sub>D</sub><sup>T</sup> (concentration (g/100 mL), solvent).

## 1.1 Enantioselective [3 + 2] Annulation of Enals and Isatins catalyzed by NHC

**4f**

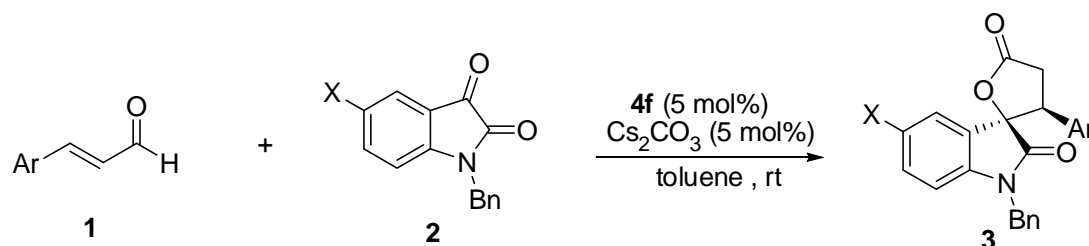

**Typical procedure.** To an oven-dried 25 mL Schlenk tube equipped with a stir bar was charged with trazolium salt **4f** (10.8 mg, 0.015 mmol), anhydrous Cs<sub>2</sub>CO<sub>3</sub> (4.9mg, 0.015 mmol). This tube was closed with a septum, evacuated, and back-filled with nitrogen. To this mixture was added freshly distilled toluene (3 mL) and stirred for 30 minutes at room temperature. Then isatin **2a** (70.8 mg, 0.3 mmol) and aldehyde **1a** (56.6 ul, 1.5 mmol) were added. After stirring for 12 h, the reaction mixture was diluted with diethyl ether and passed through a short silica pad. The solvent was removed under reduced pressure and the residue was purified by chromatography on silica gel (ethyl acetate/petroleum ether, typically 1/5) to give the desired product.

Racemic samples for the standard of chiral HPLC spectra were prepared using 10 mol% of achiral triazolium salt **S1** as the precatalyst.

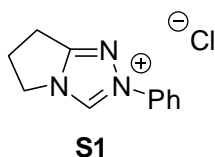

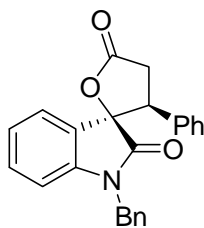

**3a**

**(2R,3S)-1'-benzoyl-3-phenyl-3H-spiro[furan-2,3'-indoline]-2',5(4H)-dione.** Yield: 111.5 mg (97%), white solid, mp 145-147°C,  $R_f = 0.48$  (petroleum ether/ethyl acetate, 3:1);  $[\alpha]_D^{20} -108.5$  ( $c$  1.0,  $\text{CH}_2\text{Cl}_2$ ), HPLC analysis: 98% ee [Daicel CHIRALPAK AD-H column, 20 °C, 254 nm hexane/*i*-PrOH = 90:10, 1.0 mL/min, 254 nm, 44.4 min (major), 61.7 min (minor)].  $^1\text{H}$  NMR (300 MHz,  $\text{CDCl}_3$ )  $\delta$  7.56 (*d*,  $J = 7.0$  Hz, 1H), 7.33-7.28 (*m*, 1H), 7.24-7.12 (*m*, 5H), 7.09-6.99 (*m*, 4H), 6.44-6.40 (*m*, 3H), 4.98 (*d*,  $J = 16.0$  Hz, 1H), 4.18 (*d*,  $J = 16.1$  Hz, 1H), 4.19-4.14 (*m*, 1H), 3.95-3.85 (*m*, 1H), 2.94 (*dd*,  $J = 7.9$  Hz,  $J = 16.7$  Hz, 1H).  $^{13}\text{C}$  NMR (300 MHz,  $\text{CDCl}_3$ )  $\delta$  174.8, 172.7, 143.6, 134.3, 132.0, 131.3, 128.8, 128.6, 128.4, 128.0, 127.3, 126.3, 124.6, 124.3, 123.5, 109.9, 86.3, 50.7, 43.6, 32.2. IR (KBr)  $\nu$  1793, 1731, 1616, 1373, 697. HRMS (EI)  $m/z$ :  $\text{M}^+$  Calc. for  $\text{C}_{24}\text{H}_{15}\text{NO}_3$ , 369.1365, Found 369.1370.

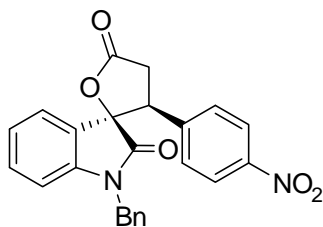

**3b**

**(2R,3S)-1'-benzyl-3-(4-nitrophenyl)-3H-spiro[furan-2,3'-indoline]-2',5(4H)-dione.** Yield: 106.6 mg (86%), white solid, mp 91-93°C,  $R_f = 0.29$  (petroleum ether/ethyl acetate, 3:1);  $[\alpha]_D^{20} -132.0$  ( $c$  1.0,  $\text{CH}_2\text{Cl}_2$ ), HPLC analysis: 93% ee [Daicel CHIRALPAK AD-H column, 20 °C, 254 nm hexane/*i*-PrOH = 80:20, 1.0 mL/min, 254 nm, 39.0 min (major), 45.0 min (minor)].  $^1\text{H}$  NMR (300 MHz,  $\text{CDCl}_3$ )  $\delta$  7.94 (*d*,  $J = 8.7$  Hz, 2H), 7.59 (*d*,  $J = 7.3$  Hz, 1H), 7.36-7.21 (*m*, 2H), 7.16-7.01 (*m*, 5H), 6.65-6.60 (*m*, 3H), 4.87 (*d*,  $J = 15.6$  Hz, 1H), 4.26 (*d*,  $J = 15.6$  Hz, 1H), 4.25-4.21 (*m*, 1H), 3.88 (*dd*,  $J = 13.6$  Hz,  $J = 16.7$  Hz, 1H), 3.02 (*dd*,  $J = 8.0$  Hz,  $J = 16.7$  Hz, 1H).

$^{13}\text{C}$  NMR (300 MHz,  $\text{CDCl}_3$ )  $\delta$  173.7, 172.2, 147.9, 143.6, 139.5, 134.4, 131.8, 128.9, 128.5, 127.9, 126.8, 124.4, 123.9, 123.7, 109.9, 85.7, 50.3, 43.8, 32.1. IR (KBr)  $\nu$  1802, 1725, 1260, 1082, 800. HRMS (EI)  $m/z$ :  $\text{M}^+$  Calc. for  $\text{C}_{24}\text{H}_{18}\text{N}_2\text{O}_5$ , 414.1216, Found 414.1222.

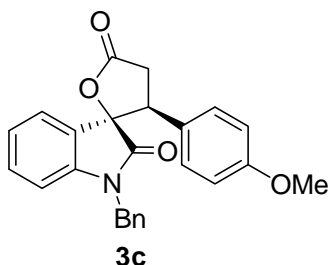

**(2R,3S)-1'-benzyl-3-(4-methoxyphenyl)-3H-spiro[furan-2,3'-indoline]-2',5(4H)-dione.** Yield: 114.1 mg (95%), white solid, mp 192-194°C,  $R_f = 0.37$  (petroleum ether/ethyl acetate, 3:1);  $[\alpha]_D^{20} -151.8$  ( $c$  1.0,  $\text{CH}_2\text{Cl}_2$ ), HPLC analysis: 85% ee [Daicel CHIRALPAK AD-H column, 20 °C, 254 nm hexane/*i*-PrOH = 70:30, 1.0 mL/min, 254 nm, 20.8 min (minor), 24.7 min (major)].  $^1\text{H}$  NMR (300 MHz,  $\text{CDCl}_3$ )  $\delta$  7.56-7.53 (*m*, 1H), 7.26-7.06 (*m*, 5H), 6.92 (*d*,  $J = 8.5$  Hz, 2H), 6.75-6.71 (*m*, 2H), 6.46-6.44 (*m*, 3H), 5.05 (*d*,  $J = 16.0$  Hz, 1H), 4.20 (*d*,  $J = 16.1$  Hz, 1H), 4.12 (*dd*,  $J = 8.1$  Hz,  $J = 14.1$  Hz, 1H), 3.86 (*dd*,  $J = 14.1$  Hz,  $J = 16.5$  Hz, 1H), 3.77 (*s*, 3H), 2.93 (*dd*,  $J = 7.8$  Hz,  $J = 16.7$  Hz, 1H).  $^{13}\text{C}$  NMR (300 MHz,  $\text{CDCl}_3$ )  $\delta$  174.9, 172.9, 159.7, 143.7, 134.4, 131.3, 129.2, 128.5, 127.4, 126.4, 124.8, 124.3, 123.8, 123.5, 114.1, 109.9, 86.5, 55.2, 50.2, 43.7, 32.4; IR (KBr)  $\nu$  1799, 1724, 1616, 1182, 490. HRMS (EI)  $m/z$ :  $\text{M}^+$  Calc. for  $\text{C}_{25}\text{H}_{21}\text{NO}_4$ , 399.1471, Found 399.1476.

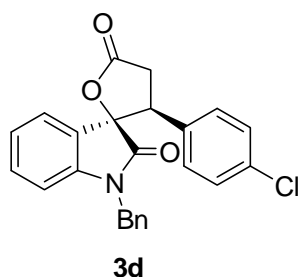

**(2R,3S)-1'-benzyl-3-(4-chlorophenyl)-3H-spiro[furan-2,3'-indoline]-2',5(4H)-dione.** Yield: 97.2 mg (80%), white solid, mp 204-206°C,  $R_f = 0.47$  (petroleum ether/ethyl acetate, 3:1);  $[\alpha]_D^{20} -160.6$  ( $c$  1.0,  $\text{CH}_2\text{Cl}_2$ ), HPLC analysis: 95% ee [Daicel CHIRALPAK AD-H column, 20 °C, 254 nm hexane/*i*-PrOH = 80:20, 1.0

mL/min, 254 nm, 18.0 min (major), 24.4 min (minor)].  $^1\text{H}$  NMR (300 MHz,  $\text{CDCl}_3$ )  $\delta$  7.57-7.54 (*m*, 1H), 7.29-7.26 (*m*, 1H), 7.24-7.15 (*m*, 6H), 6.93 (*d*,  $J = 8.5\text{ Hz}$ , 2H), 6.51-6.47 (*m*, 3H), 5.03 (*d*,  $J = 15.9\text{ Hz}$ , 1H), 4.21 (*d*,  $J = 15.9\text{ Hz}$ , 1H), 4.13 (*dd*,  $J = 8.1\text{ Hz}$ ,  $J = 13.9\text{ Hz}$ , 1H), 3.85 (*dd*,  $J = 13.8\text{ Hz}$ ,  $J = 16.7\text{ Hz}$ , 1H), 2.95 (*dd*,  $J = 8.0\text{ Hz}$ ,  $J = 16.7\text{ Hz}$ , 1H).  $^{13}\text{C}$  NMR (300 MHz,  $\text{CDCl}_3$ )  $\delta$  174.4, 172.6, 143.7, 134.5, 134.3, 131.5, 130.7, 129.4, 129.0, 128.7, 127.7, 126.34, 124.4, 124.3, 123.7, 110.0, 86.1, 50.2, 43.8, 32.2. IR (KBr)  $\nu$  1801, 1725, 1617, 1493, 1468, 697. HRMS (EI)  $m/z$ :  $\text{M}^+$  Calc. for  $\text{C}_{24}\text{H}_{18}\text{NO}_3\text{Cl}$ , 403.0975, Found 403.0981.

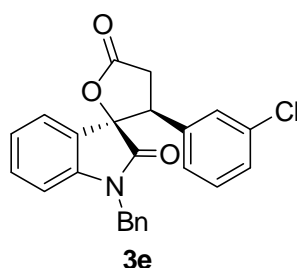

**(2R,3S)-1'-benzyl-3-(3-chlorophenyl)-3H-spiro[furan-2,3'-indoline]-2',5(4H)-dione**  
**e.** Yield: 113.8 mg (94%), white solid, mp 73-75°C,  $R_f = 0.47$  (petroleum ether/ethyl acetate, 3:1);  $[\alpha]_D^{20} -106.1$  ( $c$  1.0,  $\text{CH}_2\text{Cl}_2$ ), HPLC analysis: 89% ee [Daicel CHIRALPAK AS-H column, 20 °C, 254 nm, hexane/*i*-PrOH = 70:30, 1.0 mL/min, 254 nm, 23.1 min (minor), 33.6 min (major)].  $^1\text{H}$  NMR (300 MHz,  $\text{CDCl}_3$ )  $\delta$  7.56-7.54 (*m*, 1H), 7.25-7.05 (*m*, 7H), 6.98-5.84 (*m*, 2H), 6.56-6.50 (*m*, 3H), 4.96 (*d*,  $J = 15.7\text{ Hz}$ , 1H), 4.22 (*d*,  $J = 15.8\text{ Hz}$ , 1H), 4.15-4.10 (*m*, 1H), 3.87-3.78 (*m*, 1H), 2.96-2.92 (*m*, 1H).  $^{13}\text{C}$  NMR (300 MHz,  $\text{CDCl}_3$ )  $\delta$  174.2, 172.4, 143.5, 134.6, 134.3, 134.2, 131.5, 130.0, 128.7, 128.6, 128.0, 127.5, 126.4, 126.1, 124.3, 124.2, 123.7, 109.9, 85.9, 50.1, 43.7, 32.1. IR (KBr)  $\nu$  1798, 1724, 1616, 1180, 688. HRMS (EI)  $m/z$ :  $\text{M}^+$  Calc. for  $\text{C}_{24}\text{H}_{18}\text{NO}_3\text{Cl}$ , 403.0975, Found 403.0980.

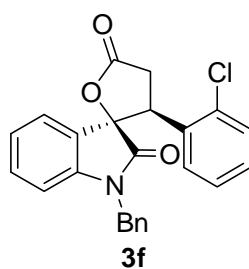

**(2R,3S)-1'-benzyl-3-(2-chlorophenyl)-3H-spiro[furan-2,3'-indoline]-2',5(4H)-dione.** Yield: 115.3 mg (95%), white solid, mp 93-95°C,  $R_f = 0.51$  (petroleum ether/ethyl acetate, 3:1);  $[\alpha]_D^{20} -72.6$  ( $c$  1.0,  $\text{CH}_2\text{Cl}_2$ ), HPLC analysis: 87% ee [Daicel CHIRALPAK AD-H column, 20 °C, 254 nm hexane/*i*-PrOH = 80:20, 1.0 mL/min, 254 nm, 18.1 min (major), 21.5 min (minor)].  $^1\text{H}$  NMR (300 MHz,  $\text{CDCl}_3$ )  $\delta$  7.70-7.69 (*m*, 1H), 7.59 (*d*,  $J = 7.4$  Hz, 1H), 7.25-7.06 (*m*, 8H), 6.55 (*d*,  $J = 7.3$  Hz, 2H), 6.44 (*d*,  $J = 7.7$  Hz, 1H), 5.03 (*d*,  $J = 15.9$  Hz, 1H), 4.90 (*dd*,  $J = 8.4$  Hz,  $J = 13.5$  Hz, 1H), 4.28 (*d*,  $J = 16.0$  Hz, 1H), 3.74 (*dd*,  $J = 13.5$  Hz,  $J = 17.0$  Hz, 1H), 3.01 (*dd*,  $J = 8.4$  Hz,  $J = 17.0$  Hz, 1H);  $^{13}\text{C}$  NMR (300 MHz,  $\text{CDCl}_3$ )  $\delta$  174.3, 173.1, 143.3, 135.1, 134.5, 131.3, 130.2, 130.0, 129.6, 129.5, 128.7, 127.5, 127.4, 126.4, 125.9, 123.9, 123.3, 109.7, 86.4, 45.3, 43.6, 34.2. IR (KBr)  $\nu$  1798, 1724, 1617, 1182, 751. HRMS (EI)  $m/z$ :  $\text{M}^+$  Calc. for  $\text{C}_{24}\text{H}_{18}\text{NO}_3\text{Cl}$ , 403.0975, Found 403.0981,

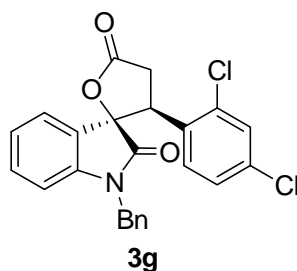

**(2R,3S)-1'-benzyl-3-(2,4-dichlorophenyl)-3H-spiro[furan-2,3'-indoline]-2',5(4H)-dione.** Yield: 113.2mg (86%), white solid, mp 162-165°C,  $R_f = 0.57$  (petroleum ether/ethyl acetate, 3:1);  $[\alpha]_D^{20} -120.7$  ( $c$  1.0,  $\text{CH}_2\text{Cl}_2$ ), HPLC analysis: 93% ee [Daicel CHIRALPAK AD-H column, 20 °C, 254 nm hexane/*i*-PrOH = 85:15, 1.0 mL/min, 254 nm, 21.5 min (major), 24.3 min (minor)].  $^1\text{H}$  NMR (300 MHz,  $\text{CDCl}_3$ )  $\delta$ : 7.61-7.57 (*m*, 2H), 7.25-7.08 (*m*, 7H), 6.60 (*d*,  $J = 6.9$ Hz, 2H), 6.51 (*d*,  $J = 7.8$  Hz, 1H), 5.04 (*d*,  $J = 15.9$  Hz, 1H), 4.83 (*dd*,  $J = 8.4$  Hz,  $J = 13.5$  Hz, 1H), 4.29(*d*,  $J = 15.9$  Hz, 1H), 3.68(*dd*,  $J = 13.6$  Hz,  $J = 17.0$  Hz, 1H), 3.00 (*dd*,  $J = 8.5$  Hz,  $J = 17.0$  Hz, 1H);  $^{13}\text{C}$  NMR (300 MHz,  $\text{CDCl}_3$ )  $\delta$  174.0, 172.8, 143.2, 135.8, 134.8, 134.4, 131.4, 130.5, 129.7, 128.8, 128.7, 127.7, 126.4, 125.9, 123.6, 123.4, 109.7, 86.1, 44.8, 43.7, 34.1; IR (KBr)  $\nu$  1803, 1724, 1479, 1182, 669. HRMS (EI)  $m/z$ :  $\text{M}^+$  Calc. for

C<sub>24</sub>H<sub>17</sub>NO<sub>3</sub>Cl<sub>2</sub>, 437.0585, Found 437.0590.

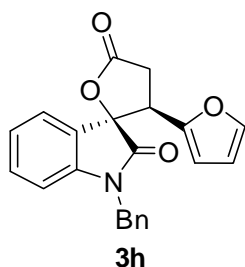

**(2R,3S)-1'-benzyl-3-(furan-2-yl)-3H-spiro[furan-2,3'-indoline]-2',5(4H)-dione.**

Yield: 104.5 mg (97%), white solid, mp 175-179 °C,  $R_f = 0.43$  (petroleum ether/ethyl acetate, 3:1);  $[\alpha]_D^{20} -79.1$  ( $c$  1.0, CH<sub>2</sub>Cl<sub>2</sub>), HPLC analysis: 86% ee [Daicel CHIRALPAK AD-H column, 20 °C, 254 nm hexane/*i*-PrOH = 80:20, 1.0 mL/min, 254 nm, 27.6 min (major), 42.4 min (minor)]. <sup>1</sup>H NMR (300 MHz, CDCl<sub>3</sub>)  $\delta$  7.48 (*d*,  $J = 7.2$  Hz, 1H), 7.29-7.11 (*m*, 6H), 6.89-6.87 (*m*, 2H), 6.61 (*d*,  $J = 7.8$  Hz, 1H), 6.27-6.26 (*m*, 1H), 6.11-6.10 (*m*, 1H), 5.02 (*d*,  $J = 15.8$  Hz, 1H), 4.40 (*d*,  $J = 15.9$  Hz, 1H), 4.21 (*dd*,  $J = 8.2$  Hz,  $J = 13.2$  Hz, 1H), 3.78 (*dd*,  $J = 13.6$  Hz,  $J = 16.8$  Hz, 1H), 3.01 (*dd*,  $J = 8.1$  Hz,  $J = 16.9$  Hz, 1H). <sup>13</sup>C NMR (300 MHz, CDCl<sub>3</sub>)  $\delta$  174.1, 172.6, 147.5, 143.7, 142.7, 134.6, 131.4, 128.8, 127.6, 127.0, 124.7, 124.4, 123.6, 110.6, 109.9, 108.5, 84.7, 44.5, 43.8, 32.3; IR (KBr)  $\nu$  1799, 1726, 1617, 1187, 750. HRMS (EI)  $m/z$ : M<sup>+</sup> Calc. for C<sub>22</sub>H<sub>17</sub>NO<sub>4</sub>, 359.1158, Found 359,1163.

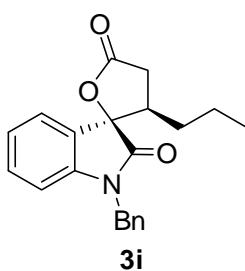

**(2R,3R)-1'-benzyl-3-propyl-3H-spiro[furan-2,3'-indoline]-2',5(4H)-dione.** Yield: 38.6 mg (38%), white solid, mp 106-108 °C,  $R_f = 0.50$  (petroleum ether/ethyl acetate, 3:1);  $[\alpha]_D^{20} 25.7$  ( $c$  1.0, CH<sub>2</sub>Cl<sub>2</sub>), HPLC analysis: 97% ee [Daicel CHIRALPAK IA-H column, 20 °C, 254 nm hexane/*i*-PrOH = 80:20, 1.0 mL/min, 254 nm, 13.6 min (minor), 15.8 min (major)]. <sup>1</sup>H NMR (300 MHz, CDCl<sub>3</sub>)  $\delta$  7.37-7.25 (*m*, 7H), 7.12-7.07 (*m*, 1H), 6.75 (*d*,  $J = 7.8$  Hz, 1H), 5.01 (*d*,  $J = 15.6$  Hz, 1H), 4.73 (*d*,  $J =$



15.6 Hz, 1H), 3.09-2.94 (*m*, 1H), 2.89-2.72 (*m*, 2H), 1.51-1.42 (*m*, 1H), 1.29-1.17 (*m*, 2H), 1.13-1.04 (*m*, 1H), 0.78 (*t*,  $J = 14.0$  Hz, 3H).  $^{13}\text{C}$  NMR (300 MHz,  $\text{CDCl}_3$ )  $\delta$  175.5, 173.4, 143.6, 135.1, 131.1, 128.9, 127.9, 127.4, 125.4, 124.3, 123.5, 109.7, 85.5, 45.6, 43.9, 33.8, 30.8, 21.3, 13.8. IR (KBr)  $\nu$  1796, 1725, 1613, 1181, 754. HRMS (EI)  $m/z$ :  $\text{M}^+$  Calc. for  $\text{C}_{21}\text{H}_{21}\text{NO}_3$ , 335.1521, Found 335.1525.

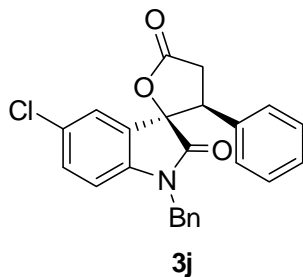

**(2R,3S)-1'-benzyl-5'-chloro-3-phenyl-3H-spiro[furan-2,3'-indoline]-2',5(4H)-dione.** Yield: 103.2 mg (85%), white solid, mp 221-223°C,  $R_f = 0.56$  (petroleum ether/ethyl acetate, 3:1);  $[\alpha]_D^{20} -140.4$  ( $c$  1.0,  $\text{CH}_2\text{Cl}_2$ ), HPLC analysis: 91% ee [Daicel CHIRALPAK AD-H column, 20 °C, 254 nm hexane/*i*-PrOH = 80:20, 1.0 mL/min, 254 nm, 17.5 min (major), 29.8 min (minor)].  $^1\text{H}$  NMR (300 MHz,  $\text{CDCl}_3$ )  $\delta$  7.56 (*s*, 1H), 7.36-7.31 (*m*, 1H), 7.25-7.03 (*m*, 8H), 6.42-6.34 (*m*, 3H), 4.98 (*d*,  $J = 16.0$  Hz, 1H), 4.21-4.13 (*m*, 2H), 3.91 (*dd*,  $J = 13.8$  Hz,  $J = 16.7$  Hz, 1H), 2.94 (*dd*,  $J = 7.9$  Hz,  $J = 16.7$  Hz, 1H).  $^{13}\text{C}$  NMR (300 MHz,  $\text{CDCl}_3$ )  $\delta$  174.3, 172.4, 142.1, 133.9, 131.7, 131.3, 129.0, 128.9, 128.8, 128.7, 128.1, 127.5, 126.4, 126.3, 124.8, 111.0, 86.0, 50.8, 43.8, 32.1; IR (KBr)  $\nu$  1805, 1726, 1612, 1178, 698. HRMS (EI)  $m/z$ :  $\text{M}^+$  Calc. for  $\text{C}_{24}\text{H}_{18}\text{NO}_3\text{Cl}$ , 403.0975, Found 409.0980.

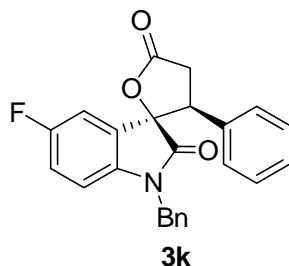

**(2R,3S)-1'-benzyl-5'-fluoro-3-phenyl-3H-spiro[furan-2,3'-indoline]-2',5(4H)-dione.** Yield: 107.4 mg (93%), white solid, mp 147-149°C,  $R_f = 0.53$  (petroleum ether/ethyl acetate, 3:1);  $[\alpha]_D^{20} -96.5$  ( $c$  1.0,  $\text{CH}_2\text{Cl}_2$ ), HPLC analysis: 80% ee [Daicel CHIRALPAK AD-H column, 20 °C, 254 nm hexane/*i*-PrOH = 80:20, 1.0 mL/min,

254 nm, 19.5 min (major), 26.4 min (minor)].  $^1\text{H}$  NMR (300 MHz,  $\text{CDCl}_3$ )  $\delta$  7.36-7.31 (*m*, 2H), 7.25-7.21 (*m*, 2H), 7.18-7.03 (*m*, 5H), 6.97-6.90 (*m*, 1H), 6.42-6.34 (*m*, 3H), 4.99 (*d*,  $J=16.0$  Hz, 1H), 4.18 (*d*,  $J=16.0$  Hz, 1H), 4.13 (*dd*,  $J=7.7$  Hz,  $J=13.6$  Hz, 1H), 3.90 (*dd*,  $J=13.8$  Hz,  $J=16.7$  Hz, 1H), 2.96 (*dd*,  $J=7.9$  Hz,  $J=16.7$  Hz, 1H).  $^{13}\text{C}$  NMR (300 MHz,  $\text{CDCl}_3$ )  $\delta$  174.4, 172.6, 159.5 (*d*,  $J=242.0$  Hz), 139.6, 143.0, 131.7, 128.9, 128.6, 128.0, 127.5, 126.3, 126.2, 117.8 (*d*,  $J=23.4$ Hz), 112.4 (*d*,  $J=25.0$  Hz), 110.8 (*d*,  $J=7.8$  Hz), 86.2, 51.0, 43.8, 32.1. IR (KBr)  $\nu$  1804, 1726, 1585, 1493, 1175, 697. HRMS (EI)  $m/z$ :  $\text{M}^+$  Calc. for  $\text{C}_{24}\text{H}_{18}\text{NO}_3\text{F}$ , 387.1271, Found 387.1276.

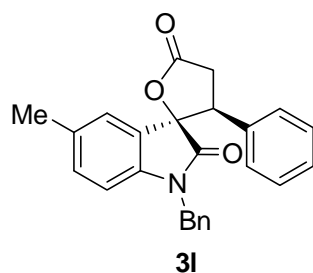

**(2R,3S)-1'-benzyl-5'-methyl-3-phenyl-3H-spiro[furan-2,3'-indoline]-2',5(4H)-dione.** Yield: 105.1 mg (91%), white solid, mp 179-181°C,  $R_f = 0.49$  (petroleum ether/ethyl acetate, 3:1);  $[\alpha]_D^{20} -149.8$  ( $c$  1.0,  $\text{CH}_2\text{Cl}_2$ ), HPLC analysis: 86% ee [Daicel CHIRALPAK AD-H column, 20 °C, 254 nm hexane/*i*-PrOH = 80:20, 1.0 mL/min, 254 nm, 14.5 min (major), 26.4 min (minor)].  $^1\text{H}$  NMR (300 MHz,  $\text{CDCl}_3$ )  $\delta$  7.38 (*s*, 1H), 7.33-7.28 (*m*, 1H), 7.24-7.11 (*m*, 3H), 7.08-6.99 (*m*, 5H), 6.42-6.39 (*m*, 2H), 6.31 (*d*,  $J=8.0$  Hz, 1H), 4.95 (*d*,  $J=16.0$  Hz, 1H), 4.16 (*d*,  $J=16.0$  Hz, 1H), 4.20-4.16 (*m*, 1H), 3.89 (*dd*,  $J=13.8$  Hz,  $J=16.7$  Hz, 1H), 2.93 (*dd*,  $J=8.0$  Hz,  $J=16.7$  Hz, 1H), 2.35(*s*, 3H),  $^{13}\text{C}$  NMR (300MHz,  $\text{CDCl}_3$ )  $\delta$  174.8, 172.7, 141.2, 134.4, 133.2, 132.1, 131.6, 128.7, 128.6, 128.3, 128.0, 127.2, 126.3, 124.9, 124.6, 109.6, 86.5, 50.6, 43.6, 32.2, 21.1. IR (KBr)  $\nu$  1796, 1724, 1603, 1172, 697. HRMS (EI)  $m/z$ :  $\text{M}^+$  Calc. for  $\text{C}_{25}\text{H}_{21}\text{NO}_3$ , 383.1521, Found 383.1526.

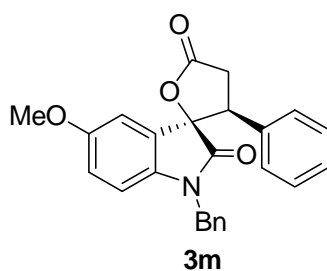

**(2R,3S)-1'-benzyl-5'-methoxy-3-phenyl-3H-spiro[furan-2,3'-indoline]-2',5(4H)-di one.** Yield: 107.7mg (90%), white solid , mp 205-207°C ,  $R_f = 0.37$  (petroleum ether/ethyl acetate, 3:1);  $[\alpha]_D^{20} -144.6$  ( $c$  0.8,  $\text{CH}_2\text{Cl}_2$ ), HPLC analysis: 99% ee [Daicel CHIRALPAK AD-H column, 20 °C, 254 nm hexane/*i*-PrOH = 70:30, 1.0 mL/min, 254 nm, 15.6 min (major), 34.4 min (minor)].  $^1\text{H}$  NMR (300 MHz,  $\text{CDCl}_3$ )  $\delta$  7.34-7.02 (*m*, 9H), 6.75-6.72 (*m*, 1H), 6.42-6.39 (*m*, 2H), 6.33 (*d*,  $J = 8.6$  Hz, 1H), 4.95 (*d*,  $J = 16.0$  Hz, 1H), 4.18-4.12 (*m*, 2H), 3.90 (*dd*,  $J = 13.8$  Hz,  $J = 16.7$  Hz, 1H), 3.80 (*s*, 3H), 2.93 (*dd*,  $J = 7.9$  Hz,  $J = 16.7$  Hz, 1H).  $^{13}\text{C}$  NMR (300 MHz,  $\text{CDCl}_3$ )  $\delta$  174.8, 172.5, 156.5, 136.8, 134.4, 132.0, 128.8, 128.6, 128.4, 128.0, 127.3, 126.3, 125.8, 115.8, 111.1, 110.5, 86.6, 55.8, 50.8, 43.7, 32.2. IR (KBr)  $\nu$  1796, 1723, 1603, 1182, 697. HRMS (EI)  $m/z$ :  $M^+$  Calc. for  $\text{C}_{25}\text{H}_{21}\text{NO}_4$ , 399.1471, Found 399.1475.

## 1.2 X-ray crystal structure of (-)-3d

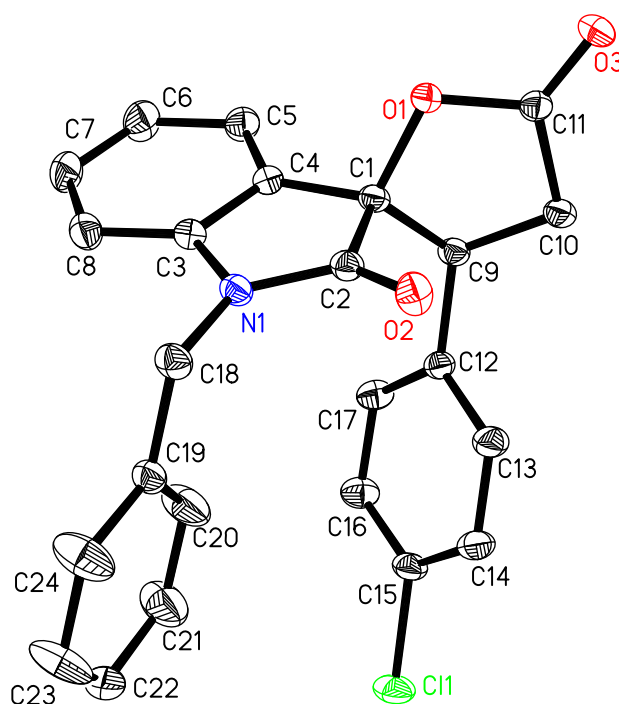

**Figure S1** X-ray crystal structure of (-)-3d

The crystal was prepared from the solution of (-)-3d in ethyl acetate/petroleum

ether (5/1) with trace of petroleum ether.

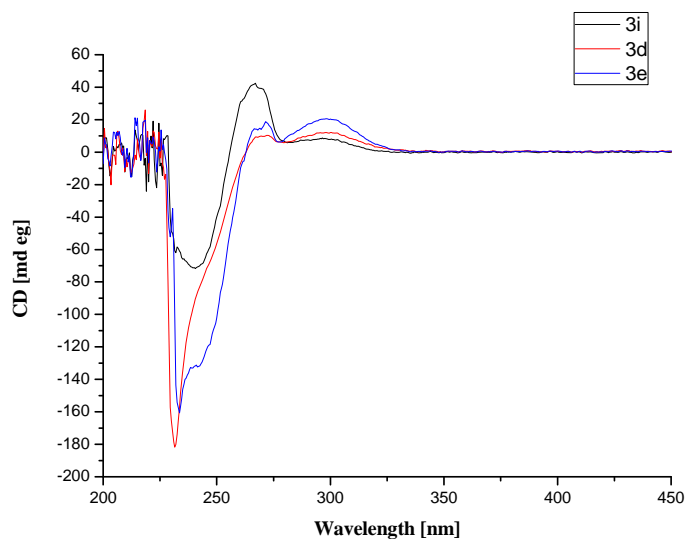

**Figure S2** CD spectrum of (-)-**3d**, **3e** and **3i**

The stereochemistry of other products **3a-3m** were assigned by their specific rotation and CD spectrum.

### References

- (1) (a) Y. R. Zhang, L. He, X. Wu, P.L. Shao and S. Ye, *Org. Lett.* **2008**, *10*, 277. (b) H. Lv, Y. R. Zhang, X. L. Huang and S. Ye, *Adv. Synth. Catal.* **2008**, *350*, 2715. (c) L. He, Y. R. Zhang, X. L. Huang and S. Ye, *Synthesis*. **2008**, *17*, 2825. (d) X. L. Huang, L. He, P. L. Shao and S. Ye. *Angew. Chem. Int. Ed.* **2009**, *48*, 192.
- (2) Larry E. Overman and Emily A. Peterson. *Tetrahedron*. **2003**, *59*, 6905–6919.
- (3) Rosenmund Zetsche. *Chem. Ber.* **1923**, *56*, 1483.

## Part II NMR Spectra

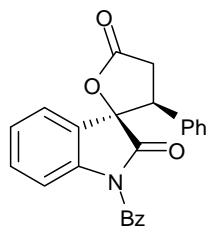

**3aa**

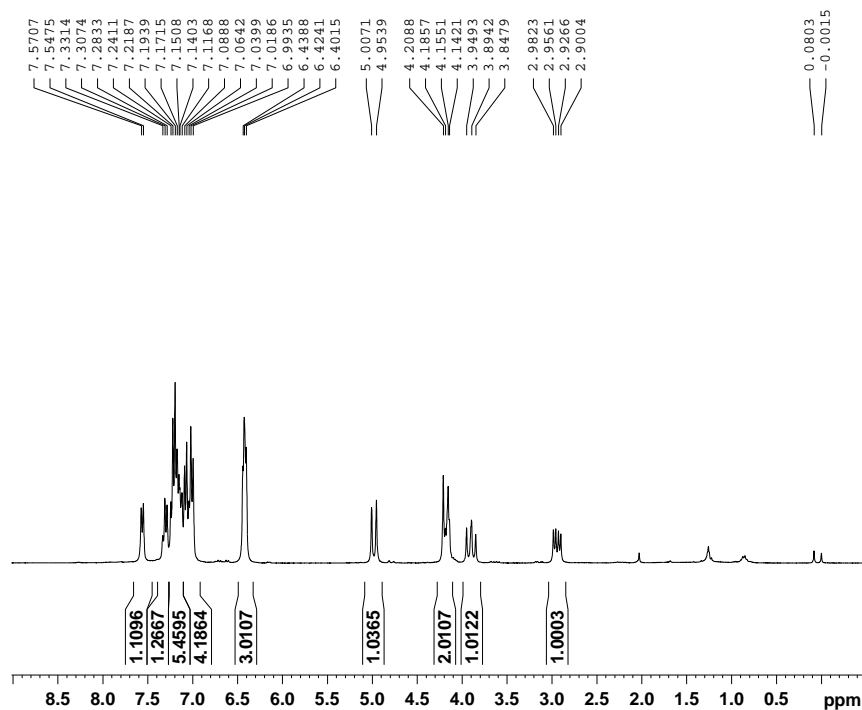

```
Current Data Parameters
NAME sunlh-404B
EXPNO 20
PROCNO 1

F2 - Acquisition Parameters
Date_ 20110107
Time 16.31
INSTRUM spect
PROBHD 5 mm DUL 13C-1
PULPROG zg30
TD 65536
SOLVENT CDCl3
NS 8
DS 0
SWH 8992.806 Hz
FIDRES 0.137219 Hz
AQ 3.6438515 sec
RG 128
DW 55.600 usec
DE 8.00 usec
TE 296.0 K
D1 1.00000000 sec
TD0 1
```

```
===== CHANNEL f1 =====
NUC1 1H
P1 10.80 usec
PL1 3.00 dB
SFO1 300.1324010 MHz
```

```
F2 - Processing parameters
SI 32768
SF 300.1300106 MHz
WDW EM
SSB 0
LB 0.30 Hz
GB 0
PC 1.00
```

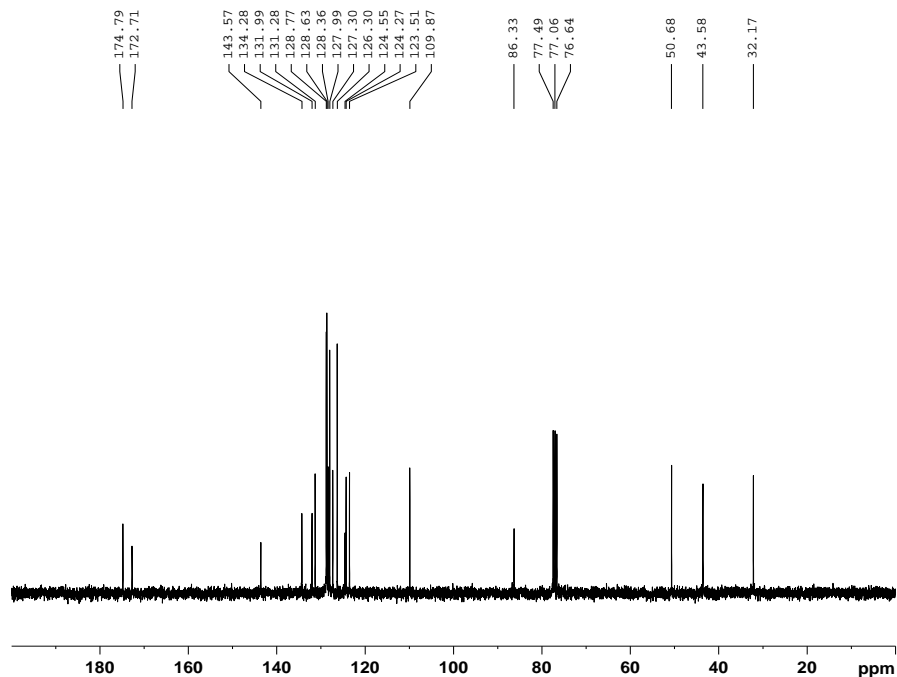

```
Current Data Parameters
NAME sunlh-404B
EXPNO 21
PROCNO 1
```

```
F2 - Acquisition Parameters
Date_ 20110107
Time 16.34
INSTRUM spect
PROBHD 5 mm DUL 13C-1
PULPROG zgpg30
TD 65536
SOLVENT CDCl3
NS 31
DS 4
SWH 17985.611 Hz
FIDRES 0.274439 Hz
AQ 1.8219508 sec
RG 16384
DW 27.800 usec
DE 8.00 usec
TE 296.1 K
D1 2.00000000 sec
D11 0.03000000 sec
TD0 1
```

```
===== CHANNEL f1 =====
NUC1 13C
P1 12.50 usec
PL1 2.00 dB
SFO1 75.4752953 MHz
```

```
===== CHANNEL f2 =====
CPDPRG2 waltz16
NUC2 1H
PCPD2 100.00 usec
PL2 3.00 dB
PL12 22.33 dB
PL13 23.00 dB
SFO2 300.1312005 MHz
```

```
F2 - Processing parameters
SI 32768
SF 75.4677544 MHz
WDW EM
SSB 0
LB 1.00 Hz
GB 0
PC 1.40
```

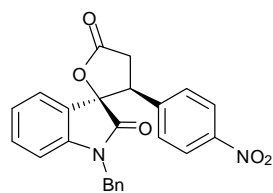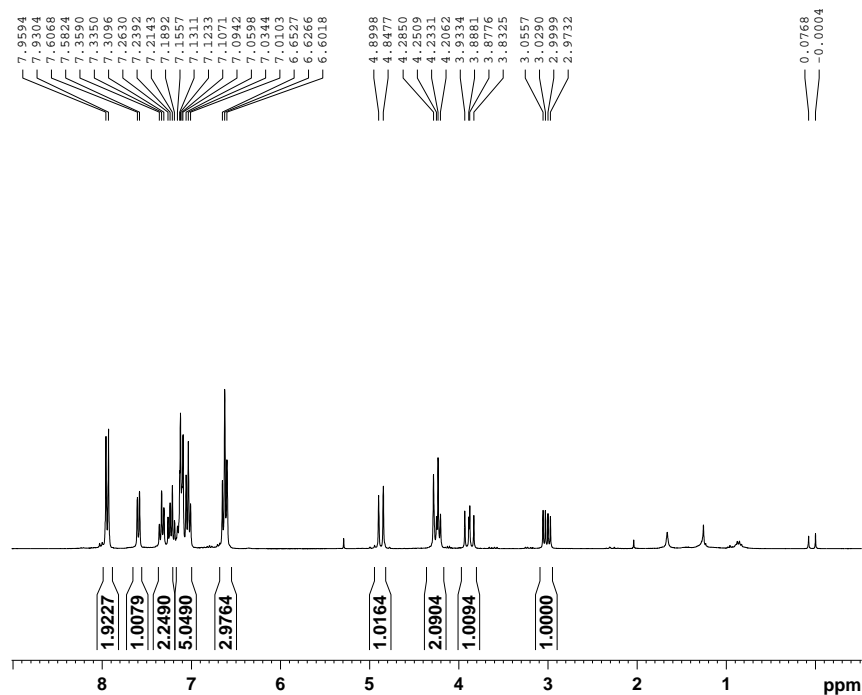

Current Data Parameters  
 NAME sunlh-0618-409A-H  
 EXPNO 10  
 PROCNO 1

F2 - Acquisition Parameters  
 Date\_ 20110618  
 Time 16.41  
 INSTRUM spect  
 PROBHD 5 mm DUL 13C-1  
 PULPROG zg30  
 TD 65536  
 SOLVENT CDCl3  
 NS 16  
 DS 0  
 SWH 8992.806 Hz  
 FIDRES 0.137219 Hz  
 AQ 3.6438515 sec  
 RG 128  
 DW 55.600 usec  
 DE 8.00 usec  
 TE 299.5 K  
 D1 1.00000000 sec  
 TDO 1

===== CHANNEL f1 =====  
 NUC1 1H  
 P1 10.80 usec  
 PL1 3.00 dB  
 SFO1 300.1324010 MHz

F2 - Processing parameters  
 SI 32768  
 SF 300.1300050 MHz  
 WDW EM  
 SSB 0  
 LB 0.30 Hz  
 GB 0  
 PC 1.00

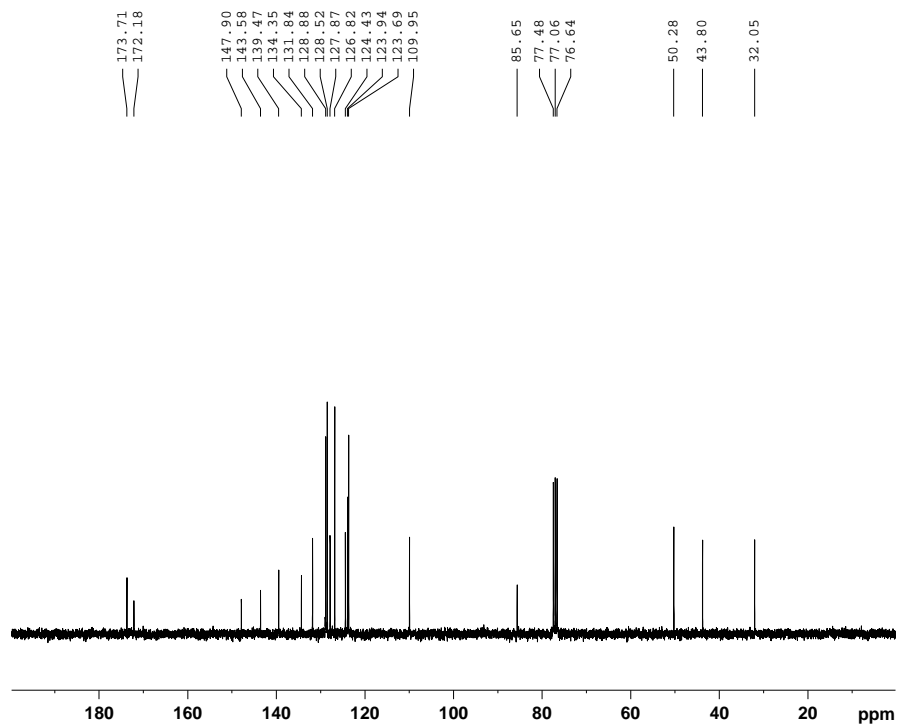

Current Data Parameters  
 NAME sunlh-0618-409A-C  
 EXPNO 10  
 PROCNO 1

F2 - Acquisition Parameters  
 Date\_ 20110618  
 Time 16.45  
 INSTRUM spect  
 PROBHD 5 mm DUL 13C-1  
 PULPROG zgpg30  
 TD 65536  
 SOLVENT CDCl3  
 NS 85  
 DS 4  
 SWH 17985.611 Hz  
 FIDRES 0.274439 Hz  
 AQ 1.8219508 sec  
 RG 1625.5  
 DW 27.800 usec  
 DE 6.50 usec  
 TE 300.0 K  
 D1 2.00000000 sec  
 D11 0.03000000 sec  
 TDO 1

===== CHANNEL f1 =====  
 NUC1 13C  
 P1 12.50 usec  
 PL1 2.00 dB  
 SFO1 75.4752953 MHz

===== CHANNEL f2 =====  
 CPDPRG2 waltz16  
 NUC2 1H  
 PCPD2 100.00 usec  
 PL2 3.00 dB  
 PL12 22.33 dB  
 PL13 23.00 dB  
 SFO2 300.1312005 MHz

F2 - Processing parameters  
 SI 32768  
 SF 75.4677490 MHz  
 WDW EM  
 SSB 0  
 LB 1.00 Hz  
 GB 0  
 PC 1.40

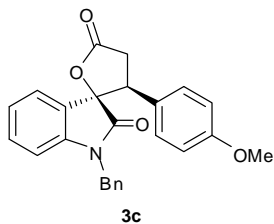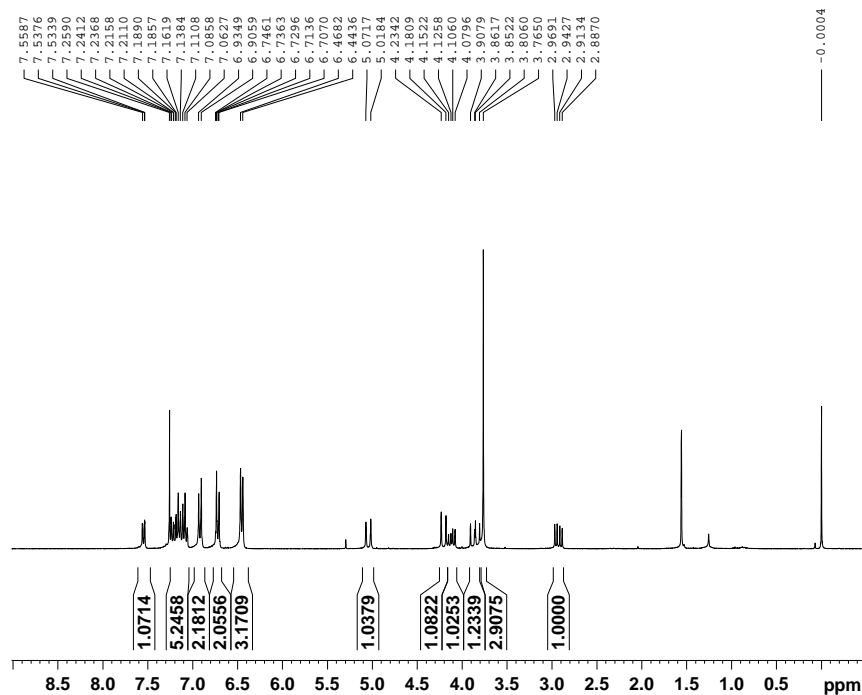

```

Current Data Parameters
NAME sunlh-0622-cho
EXPNO 10
PROCNO 1

F2 - Acquisition Parameters
Date_ 20110622
Time 8.18
INSTRUM spect
PROBHD 5 mm DUL 13C-1
PULPROG zg30
TD 65536
SOLVENT CDCl3
NS 16
DS 0
SWH 8992.806 Hz
FIDRES 0.137219 Hz
AQ 3.6438515 sec
RG 456.1
DW 55.600 usec
DE 8.00 usec
TE 299.2 K
D1 1.00000000 sec
TD0 1

===== CHANNEL f1 =====
NUC1 13
P1 10.80 usec
PL1 3.00 dB
SFO1 300.1324010 MHz

F2 - Processing parameters
SI 32768
SF 300.1300064 MHz
WDW EM
SSB 0
LB 0.30 Hz
GB 0
PC 1.00
    
```

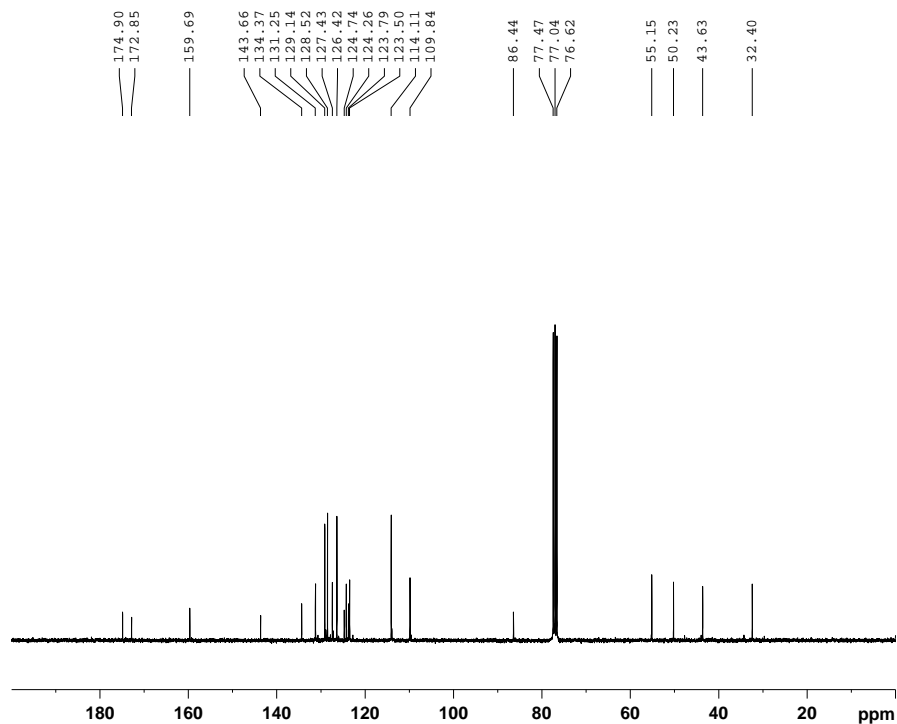

```

Current Data Parameters
NAME sunlh-410A
EXPNO 20
PROCNO 1

F2 - Acquisition Parameters
Date_ 20110107
Time 21.54
INSTRUM spect
PROBHD 5 mm DUL 13C-1
PULPROG zgpg30
TD 65536
SOLVENT CDCl3
NS 1024
DS 4
SWH 17985.611 Hz
FIDRES 0.274439 Hz
AQ 1.8219508 sec
RG 5792.6
DW 27.800 usec
DE 8.00 usec
TE 296.8 K
D1 2.00000000 sec
D11 0.03000000 sec
TD0 1

===== CHANNEL f1 =====
NUC1 13
P1 12.50 usec
PL1 2.00 dB
SFO1 75.4752953 MHz

===== CHANNEL f2 =====
CPDPRG2 waltz16
NUC2 1H
PCPD2 100.00 usec
PL2 3.00 dB
PL12 22.33 dB
PL13 23.00 dB
SFO2 300.1312005 MHz

F2 - Processing parameters
SI 32768
SF 75.4677490 MHz
WDW EM
SSB 0
LB 1.00 Hz
GB 0
PC 1.40
    
```

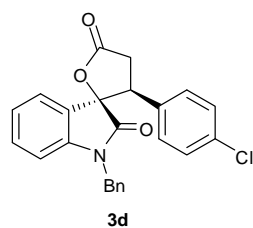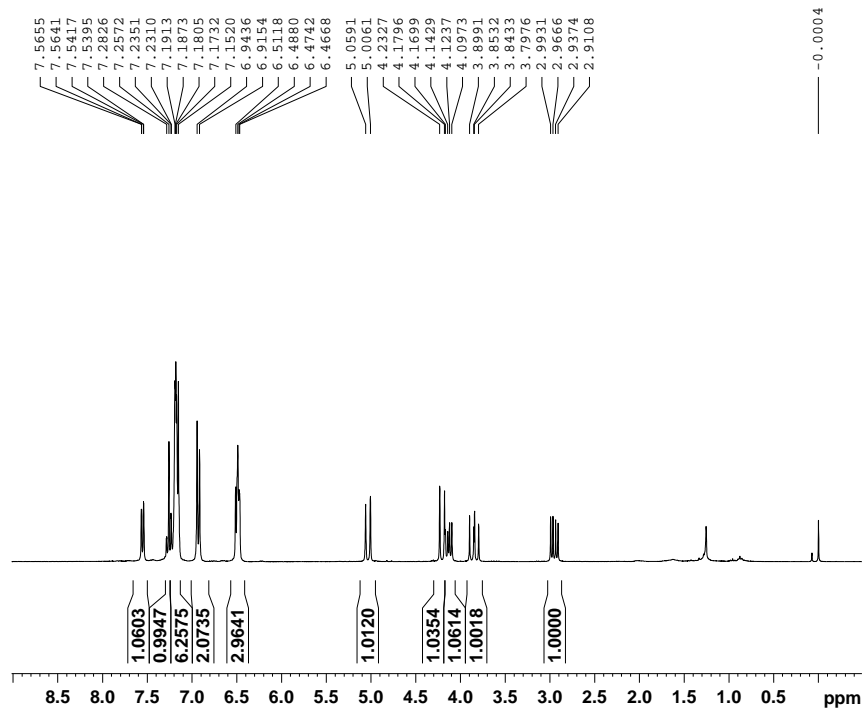

```
Current Data Parameters
NAME      sunlh-430A-H
EXPNO    10
PROCNO   1

F2 - Acquisition Parameters
Date_    20110318
Time     20.50
INSTRUM  spect
PROBHD   5 mm DUL 13C-1
PULPROG  zg30
TD       65536
SOLVENT  CDCl3
NS       16
DS       0
SWH      8992.806 Hz
FIDRES   0.137219 Hz
AQ       3.6438515 sec
RG       256
DW       55.600 usec
DE       8.00 usec
TE       295.4 K
D1       1.00000000 sec
TD0      1
```

```
===== CHANNEL f1 =====
NUC1     1H
P1       10.80 usec
PL1      3.00 dB
SFO1     300.1324010 MHz
```

```
F2 - Processing parameters
SI       32768
SF       300.1300067 MHz
WDW      EM
SSB      0
LB       0.30 Hz
GB       0
PC       1.00
```

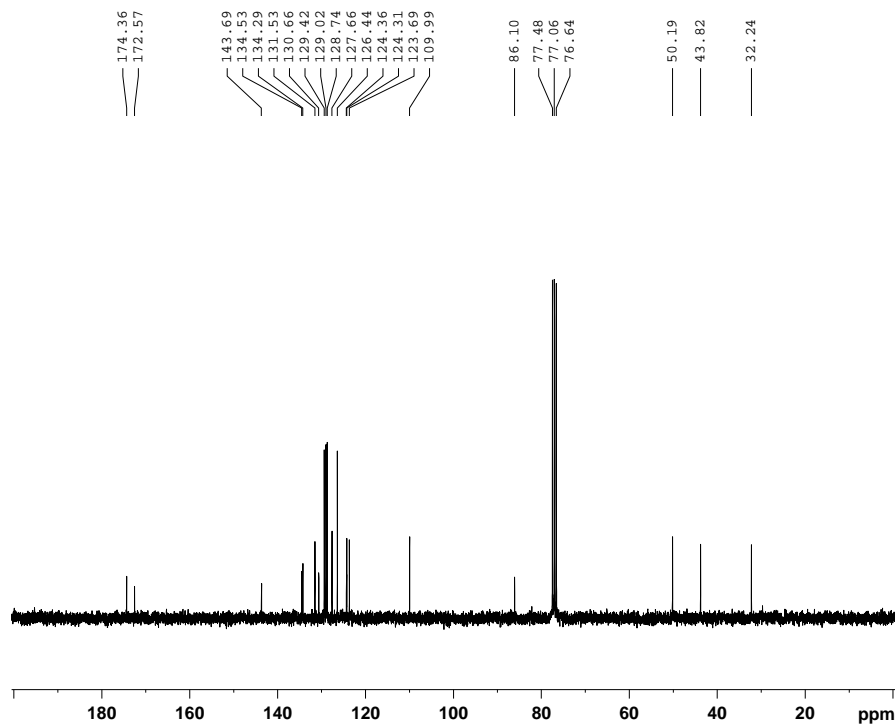

```
Current Data Parameters
NAME      sunlh-0624-430A-C
EXPNO    12
PROCNO   1

F2 - Acquisition Parameters
Date_    20110624
Time     17.00
INSTRUM  spect
PROBHD   5 mm DUL 13C-1
PULPROG  zgpg30
TD       65536
SOLVENT  CDCl3
NS       111
DS       4
SWH      17985.611 Hz
FIDRES   0.274439 Hz
AQ       1.8219508 sec
RG       645.1
DW       27.800 usec
DE       6.50 usec
TE       299.7 K
D1       2.00000000 sec
D11      0.03000000 sec
TD0      1
```

```
===== CHANNEL f1 =====
NUC1     13C
P1       12.50 usec
PL1      2.00 dB
SFO1     75.4752953 MHz
```

```
===== CHANNEL f2 =====
PCPDPRG2 waltz16
NUC2     1H
PCPD2    100.00 usec
PL2      3.00 dB
PL12     22.33 dB
PL13     23.00 dB
SFO2     300.1312005 MHz
```

```
F2 - Processing parameters
SI       32768
SF       75.4675441 MHz
WDW      EM
SSB      0
LB       1.00 Hz
GB       0
PC       1.40
```



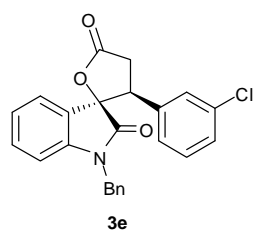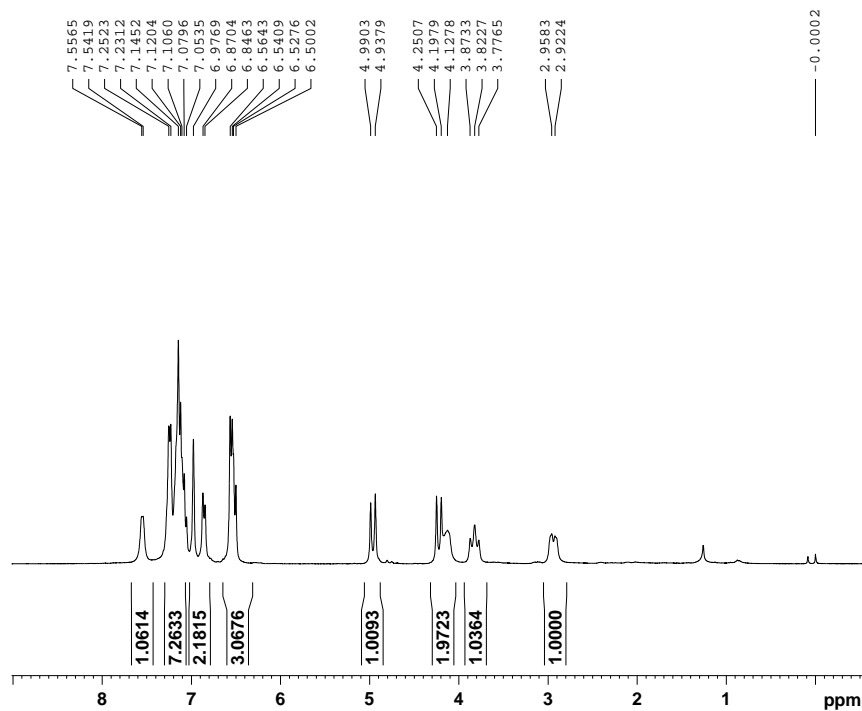

```
Current Data Parameters
NAME sunlh-0625-446A
EXPNO 10
PROCNO 1

F2 - Acquisition Parameters
Date_ 20110625
Time 11.37
INSTRUM spect
PROBHD 5 mm DUL 13C-1
PULPROG zg30
TD 65536
SOLVENT CDCl3
NS 13
DS 0
SWH 8992.806 Hz
FIDRES 0.137219 Hz
AQ 3.6438515 sec
RG 128
DW 55.600 usec
DE 8.00 usec
TE 299.6 K
D1 1.00000000 sec
TD0 1
```

```
===== CHANNEL f1 =====
NUC1 1H
P1 10.80 usec
PL1 3.00 dB
SFO1 300.1324010 MHz

F2 - Processing parameters
SI 32768
SF 300.1292086 MHz
WDW EM
SBB 0
LB 0.30 Hz
GB 0
PC 1.00
```

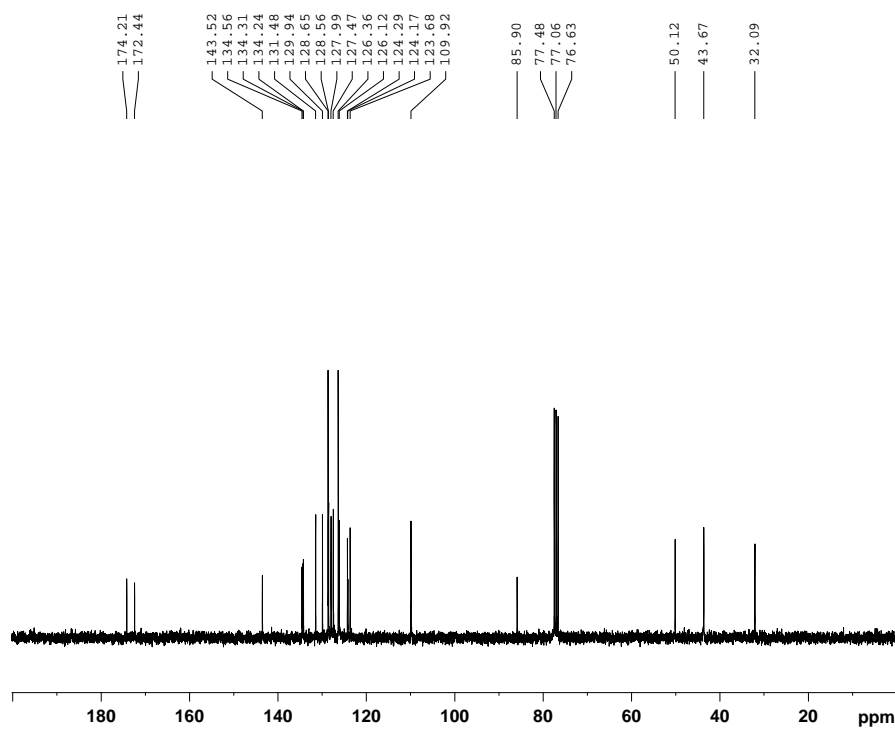

```
Current Data Parameters
NAME sunlh-0625-446A
EXPNO 11
PROCNO 1

F2 - Acquisition Parameters
Date_ 20110625
Time 11.40
INSTRUM spect
PROBHD 5 mm DUL 13C-1
PULPROG zgpg30
TD 65536
SOLVENT CDCl3
NS 24
DS 4
SWH 17985.611 Hz
FIDRES 0.274439 Hz
AQ 1.8219508 sec
RG 2896.3
DW 27.800 usec
DE 6.50 usec
TE 299.9 K
D1 2.00000000 sec
D11 0.03000000 sec
TD0 1
```

```
===== CHANNEL f1 =====
NUC1 13C
P1 12.50 usec
PL1 2.00 dB
SFO1 75.4752953 MHz

===== CHANNEL f2 =====
PCPD2 100.00 usec
PL2 3.00 dB
PL12 22.33 dB
PL13 23.00 dB
SFO2 300.1312005 MHz
```

```
F2 - Processing parameters
SI 32768
SF 75.4675557 MHz
WDW EM
SBB 0
LB 1.00 Hz
GB 0
PC 1.40
```

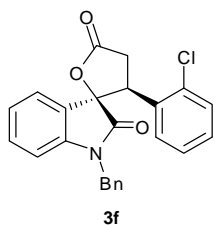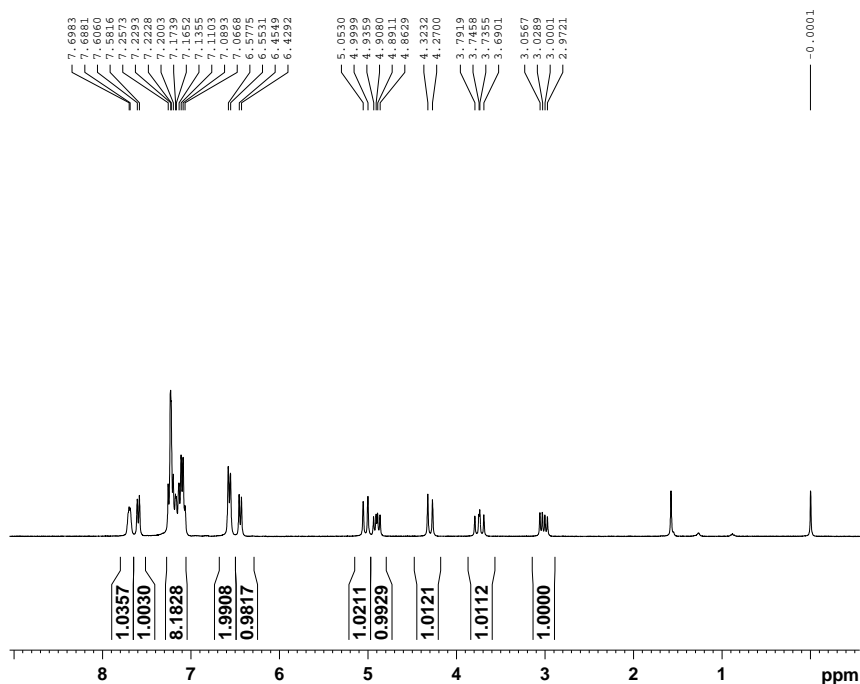

```

Current Data Parameters
NAME sunlh-0626-431A
EXPNO 10
PROCNO 1

F2 - Acquisition Parameters
Date_ 20110626
Time 13.53
INSTRUM spect
PROBHD 5 mm DUL 13C-1
PULPROG zg30
TD 65536
SOLVENT CDCl3
NS 16
DS 0
SWH 8992.806 Hz
FIDRES 0.137219 Hz
AQ 3.6438515 sec
RG 456.1
DW 55.600 usec
DE 8.00 usec
TE 299.5 K
D1 1.00000000 sec
TD0 1

===== CHANNEL f1 =====
NUC1 1H
P1 10.80 usec
PL1 3.00 dB
SFO1 300.1324010 MHz

F2 - Processing parameters
SI 32768
SF 300.1292317 MHz
WDW EM
SSB 0
LB 0.30 Hz
GB 0
PC 1.00
    
```

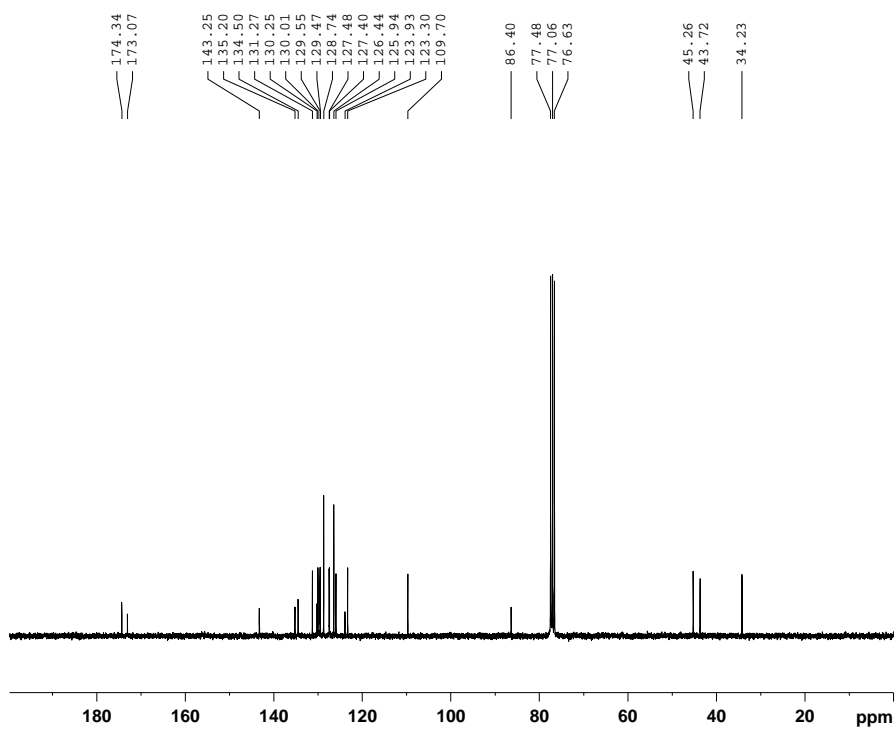

```

Current Data Parameters
NAME sunlh-0626-431A-C
EXPNO 10
PROCNO 1

F2 - Acquisition Parameters
Date_ 20110626
Time 13.56
INSTRUM spect
PROBHD 5 mm DUL 13C-1
PULPROG zgpg30
TD 65536
SOLVENT CDCl3
NS 823
DS 4
SWH 17985.611 Hz
FIDRES 0.274439 Hz
AQ 1.8219508 sec
RG 456.1
DW 27.800 usec
DE 6.50 usec
TE 299.5 K
D1 2.00000000 sec
D11 0.03000000 sec
TD0 1

===== CHANNEL f1 =====
NUC1 13C
P1 12.50 usec
PL1 2.00 dB
SFO1 75.4752953 MHz

===== CHANNEL f2 =====
PCPD2 100.00 usec
PL2 3.00 dB
PL12 22.33 dB
PL13 23.00 dB
SFO2 300.1312005 MHz

F2 - Processing parameters
SI 32768
SF 75.4675513 MHz
WDW EM
SSB 0
LB 1.00 Hz
GB 0
PC 1.40
    
```

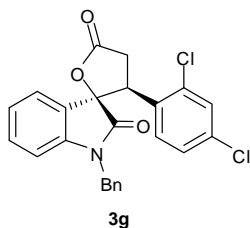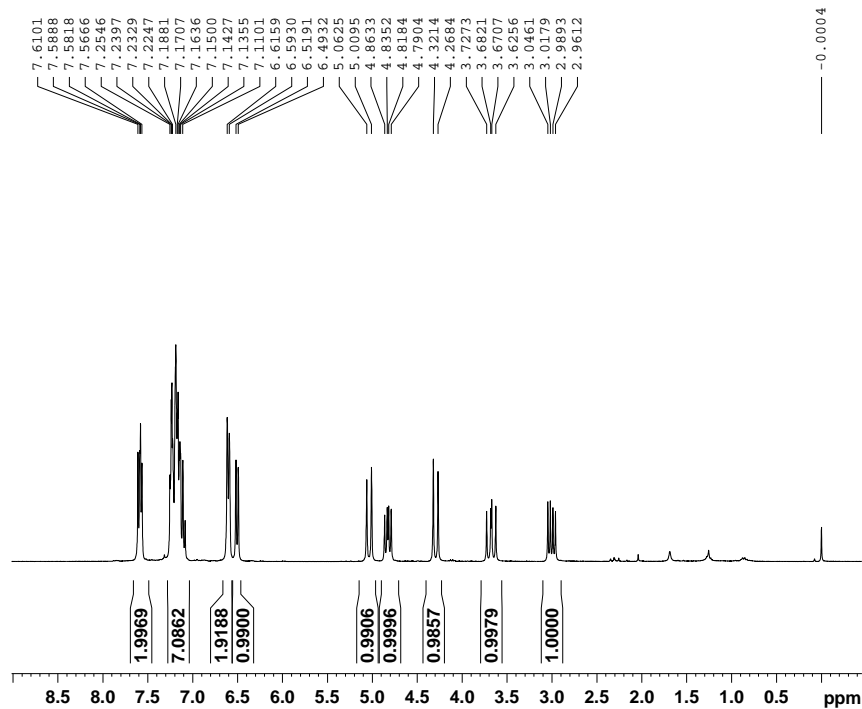

```
Current Data Parameters
NAME sunlh-464A
EXPNO 10
PROCNO 1

F2 - Acquisition Parameters
Date_ 20110323
Time 18.25
INSTRUM spect
PROBHD 5 mm DUL 13C-1
PULPROG zg30
TD 65536
SOLVENT CDCl3
NS 8
DS 0
SWH 8992.806 Hz
FIDRES 0.137219 Hz
AQ 3.6438515 sec
RG 128
DW 55.600 usec
DE 8.00 usec
TE 295.5 K
D1 1.00000000 sec
TD0 1
```

```
===== CHANNEL f1 =====
NUC1 1H
P1 10.80 usec
PL1 3.00 dB
SFO1 300.1324010 MHz

F2 - Processing parameters
SI 32768
SF 300.1300070 MHz
WDW EM
SSB 0
LB 0.30 Hz
GB 0
PC 1.00
```

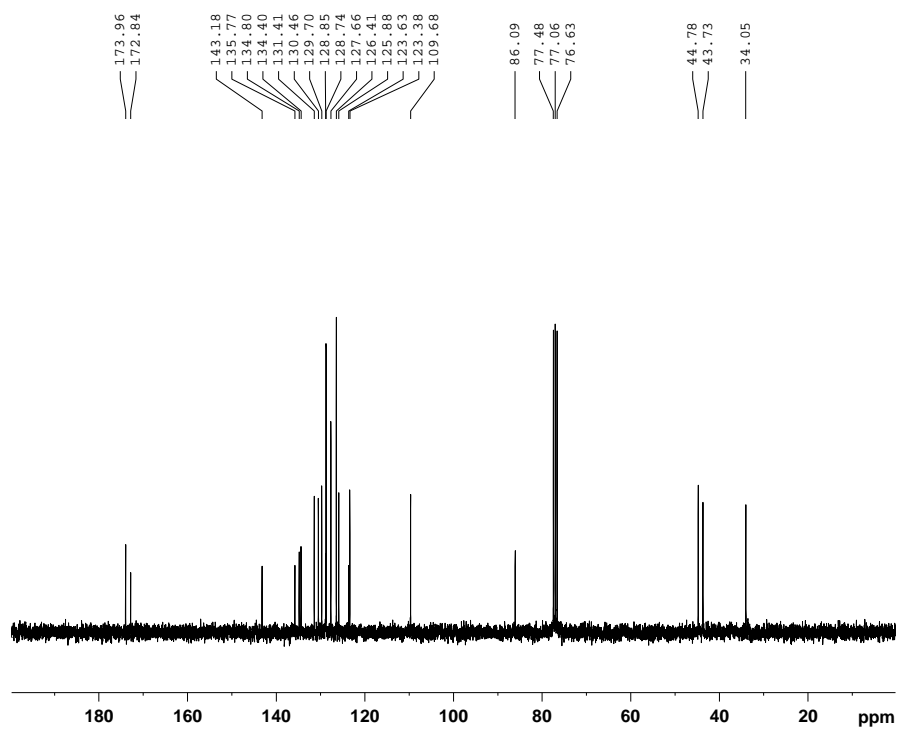

```
Current Data Parameters
NAME sunlh-464A
EXPNO 11
PROCNO 1

F2 - Acquisition Parameters
Date_ 20110323
Time 18.27
INSTRUM spect
PROBHD 5 mm DUL 13C-1
PULPROG zgpg30
TD 65536
SOLVENT CDCl3
NS 42
DS 4
SWH 17985.611 Hz
FIDRES 0.274439 Hz
AQ 1.8219508 sec
RG 456.1
DW 27.800 usec
DE 6.50 usec
TE 295.8 K
D1 2.00000000 sec
D11 0.03000000 sec
TD0 1
```

```
===== CHANNEL f1 =====
NUC1 13C
P1 12.50 usec
PL1 2.00 dB
SFO1 75.4752953 MHz

===== CHANNEL f2 =====
PCPD2 100.00 usec
PL2 3.00 dB
PL12 22.33 dB
PL13 23.00 dB
SFO2 300.1312005 MHz
```

```
F2 - Processing parameters
SI 32768
SF 75.4677505 MHz
WDW EM
SSB 0
LB 1.00 Hz
GB 0
PC 1.40
```

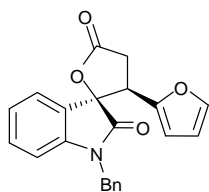

3h

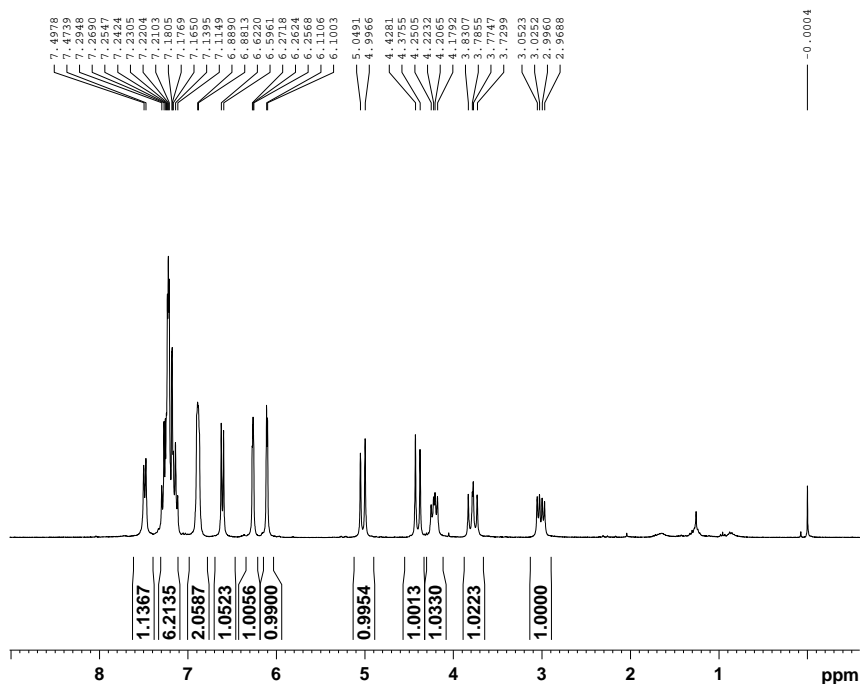

```
Current Data Parameters
NAME sunlh-443A
EXPNO 11
PROCNO 1

F2 - Acquisition Parameters
Date_ 20110323
Time 8.23
INSTRUM spect
PROBHD 5 mm DUL 13C-1
PULPROG zg30
TD 65536
SOLVENT CDCl3
NS 8
DS 0
SWH 8992.806 Hz
FIDRES 0.137219 Hz
AQ 3.6438515 sec
RG 181
DW 55.600 usec
DE 8.00 usec
TE 294.4 K
D1 1.00000000 sec
TD0 1

===== CHANNEL f1 =====
NUC1 1H
P1 10.80 usec
PL1 3.00 dB
SFO1 300.1324010 MHz

F2 - Processing parameters
SI 32768
SF 300.1300074 MHz
WDW EM
SSB 0
LB 0.30 Hz
GB 0
PC 1.00
```

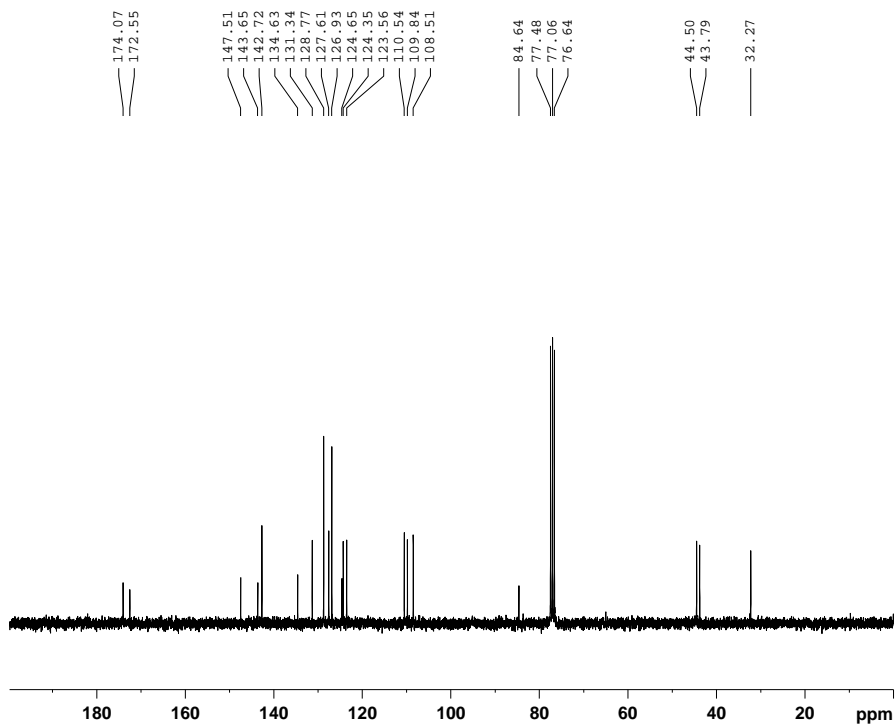

```
Current Data Parameters
NAME sunlh-443A
EXPNO 12
PROCNO 1

F2 - Acquisition Parameters
Date_ 20110323
Time 8.25
INSTRUM spect
PROBHD 5 mm DUL 13C-1
PULPROG zgpg30
TD 65536
SOLVENT CDCl3
NS 49
DS 4
SWH 17985.611 Hz
FIDRES 0.274439 Hz
AQ 1.8219508 sec
RG 4096
DW 27.800 usec
DE 8.00 usec
TE 294.6 K
D1 2.00000000 sec
D11 0.03000000 sec
TD0 1

===== CHANNEL f1 =====
NUC1 13C
P1 12.50 usec
PL1 2.00 dB
SFO1 75.4752953 MHz

===== CHANNEL f2 =====
PCPD2 100.00 usec
PL2 3.00 dB
PL12 22.33 dB
PL13 23.00 dB
SFO2 300.1312005 MHz

F2 - Processing parameters
SI 32768
SF 75.4677511 MHz
WDW EM
SSB 0
LB 1.00 Hz
GB 0
PC 1.40
```

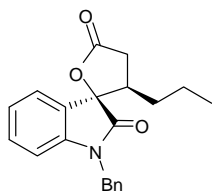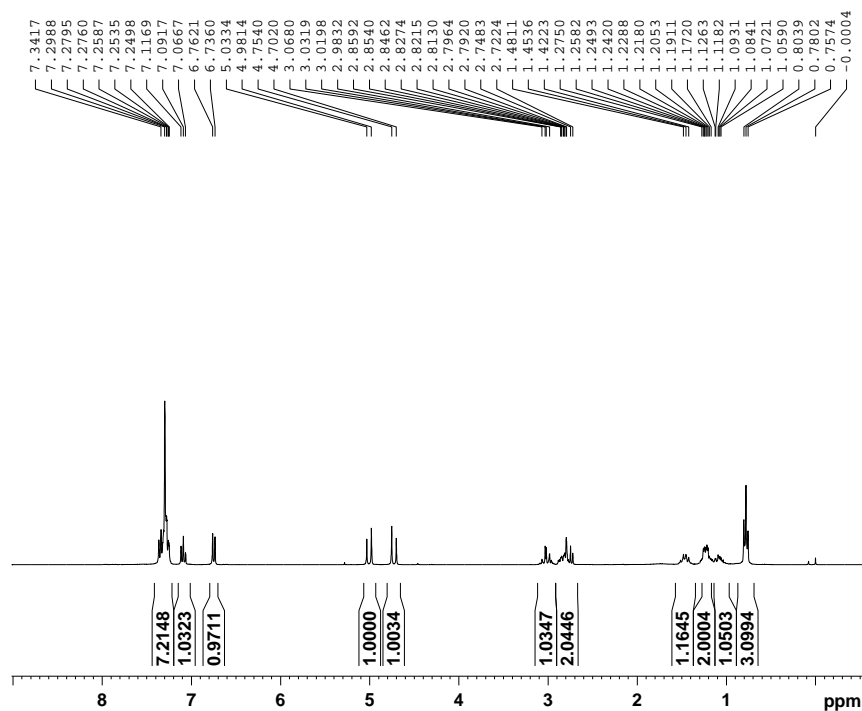

```
Current Data Parameters
NAME sunh-554H
EXPNO 10
PROCNO 1

F2 - Acquisition Parameters
Date_ 20110623
Time 20.53
INSTRUM spect
PROBHD 5 mm DUL 13C-1
PULPROG zg30
TD 65536
SOLVENT CDCl3
NS 16
DS 0
SWH 8992.806 Hz
FIDRES 0.137219 Hz
AQ 3.6438515 sec
RG 128
DW 55.600 usec
DE 8.00 usec
TE 299.8 K
D1 1.00000000 sec
TD0 1

===== CHANNEL f1 =====
NUC1 1H
P1 10.80 usec
PL1 3.00 dB
SF01 300.1324010 MHz

F2 - Processing parameters
SI 32768
SF 300.1300064 MHz
WDW EM
SSB 0
LB 0.30 Hz
GB 0
PC 1.00
```

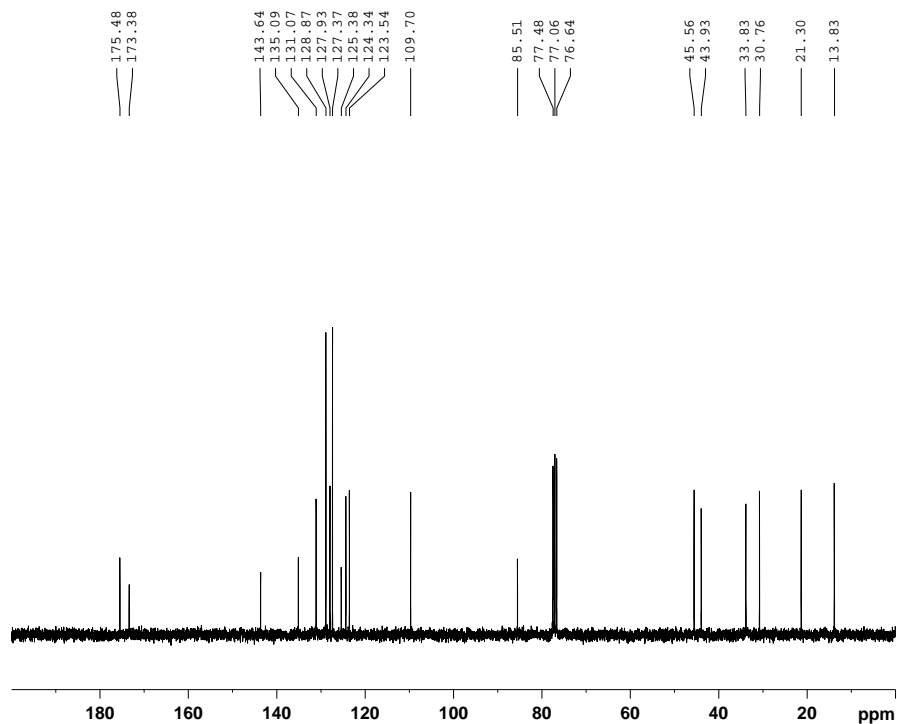

```
Current Data Parameters
NAME sunh-554C
EXPNO 10
PROCNO 1

F2 - Acquisition Parameters
Date_ 20110623
Time 20.57
INSTRUM spect
PROBHD 5 mm DUL 13C-1
PULPROG zgpg30
TD 65536
SOLVENT CDCl3
NS 57
DS 4
SWH 17985.611 Hz
FIDRES 0.274439 Hz
AQ 1.8219508 sec
RG 456.1
DW 27.800 usec
DE 6.50 usec
TE 299.9 K
D1 2.00000000 sec
D11 0.03000000 sec
TD0 1

===== CHANNEL f1 =====
NUC1 13C
P1 12.50 usec
PL1 2.00 dB
SF01 75.4752953 MHz

===== CHANNEL f2 =====
PCPD2 100.00 usec
PL2 3.00 dB
PL12 22.33 dB
PL13 23.00 dB
SF02 300.1312005 MHz

F2 - Processing parameters
SI 32768
SF 75.4677500 MHz
WDW EM
SSB 0
LB 1.00 Hz
GB 0
PC 1.40
```

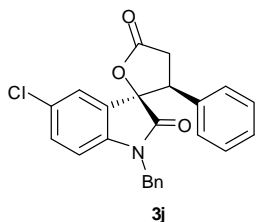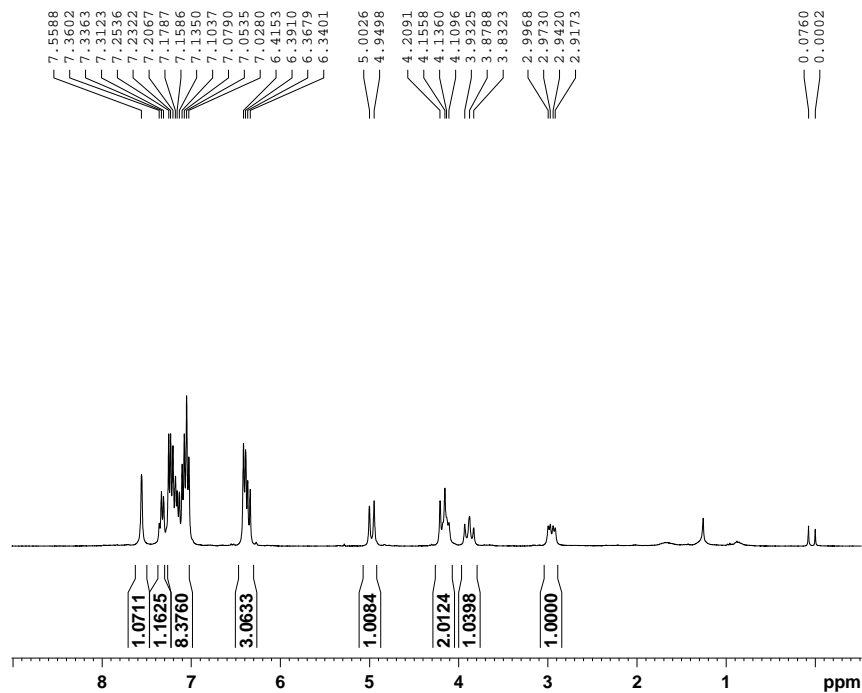

```
Current Data Parameters
NAME sunlh-0624-405
EXPNO 10
PROCNO 1

F2 - Acquisition Parameters
Date_ 20110624
Time 16.33
INSTRUM spect
PROBHD 5 mm DUL 13C-1
PULPROG zg30
TD 65536
SOLVENT CDCl3
NS 11
DS 0
SWH 8992.806 Hz
FIDRES 0.137219 Hz
AQ 3.6438515 sec
RG 181
DW 55.600 usec
DE 8.00 usec
TE 299.6 K
D1 1.00000000 sec
TD0 1
```

```
===== CHANNEL f1 =====
NUC1 1H
PL 10.80 usec
PL1 3.00 dB
SFO1 300.1324010 MHz

F2 - Processing parameters
SI 32768
SF 300.1292073 MHz
WDW EM
SSB 0
LB 0.30 Hz
GB 0
PC 1.00
```

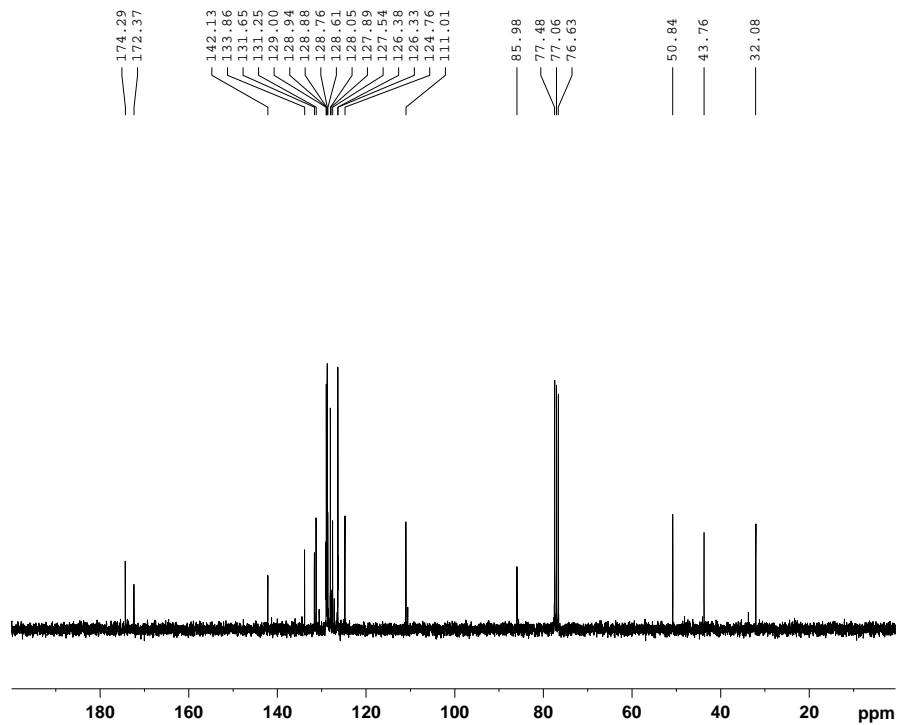

```
Current Data Parameters
NAME sunlh-424A
EXPNO 12
PROCNO 1

F2 - Acquisition Parameters
Date_ 20110120
Time 17.33
INSTRUM spect
PROBHD 5 mm DUL 13C-1
PULPROG zgpg30
TD 65536
SOLVENT CDCl3
NS 56
DS 4
SWH 17985.611 Hz
FIDRES 0.274439 Hz
AQ 1.8219508 sec
RG 6502
DW 27.800 usec
DE 8.00 usec
TE 296.7 K
D1 2.00000000 sec
D11 0.03000000 sec
TD0 1
```

```
===== CHANNEL f1 =====
NUC1 13C
PL 12.50 usec
PL1 2.00 dB
SFO1 75.4752953 MHz

===== CHANNEL f2 =====
CPDPRG2 waltz16
NUC2 1H
PCPD2 100.00 usec
PL2 3.00 dB
PL12 22.33 dB
PL13 23.00 dB
SFO2 300.1312005 MHz

F2 - Processing parameters
SI 32768
SF 75.4677500 MHz
WDW EM
SSB 0
LB 1.00 Hz
GB 0
PC 1.40
```

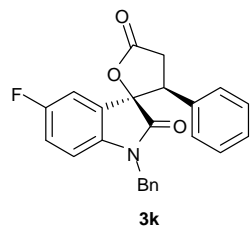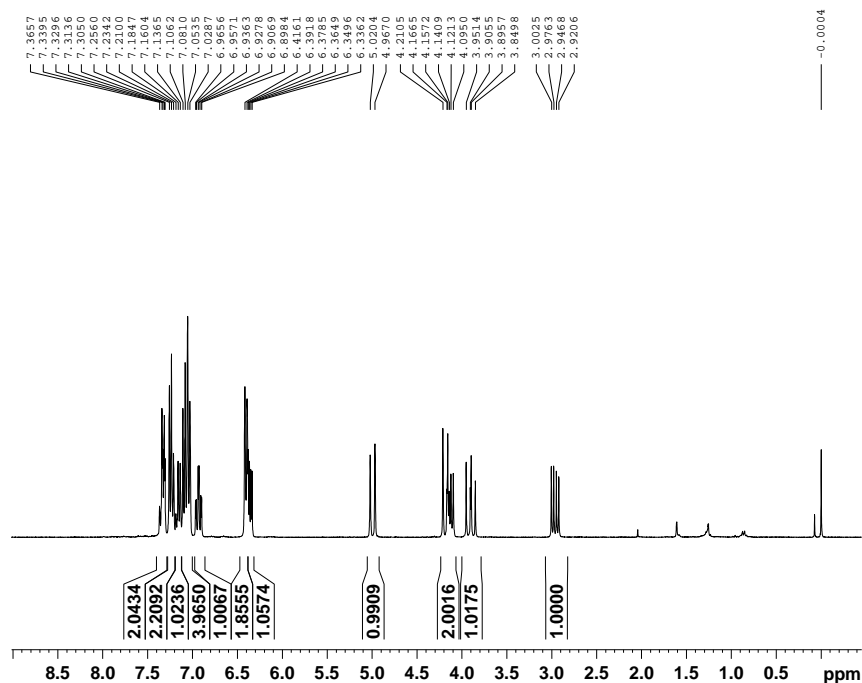

```
Current Data Parameters
NAME sunlh-407A
EXPNO 10
PROCNO 1

F2 - Acquisition Parameters
Date_ 20101227
Time 18.25
INSTRUM spect
PROBHD 5 mm DUL 13C-1
PULPROG zg30
TD 65536
SOLVENT CDCl3
NS 6
DS 0
SWH 8992.806 Hz
FIDRES 0.137219 Hz
AQ 3.6438515 sec
RG 228.1
DW 55.600 usec
DE 8.00 usec
TE 296.8 K
D1 1.0000000 sec
TD0 1
```

```
===== CHANNEL f1 =====
NUC1 1H
P1 10.80 usec
PL1 3.00 dB
SFO1 300.1324010 MHz

F2 - Processing parameters
SI 32768
SF 300.1300072 MHz
WDW EM
SSB 0
LB 0.30 Hz
GB 0
PC 1.00
```

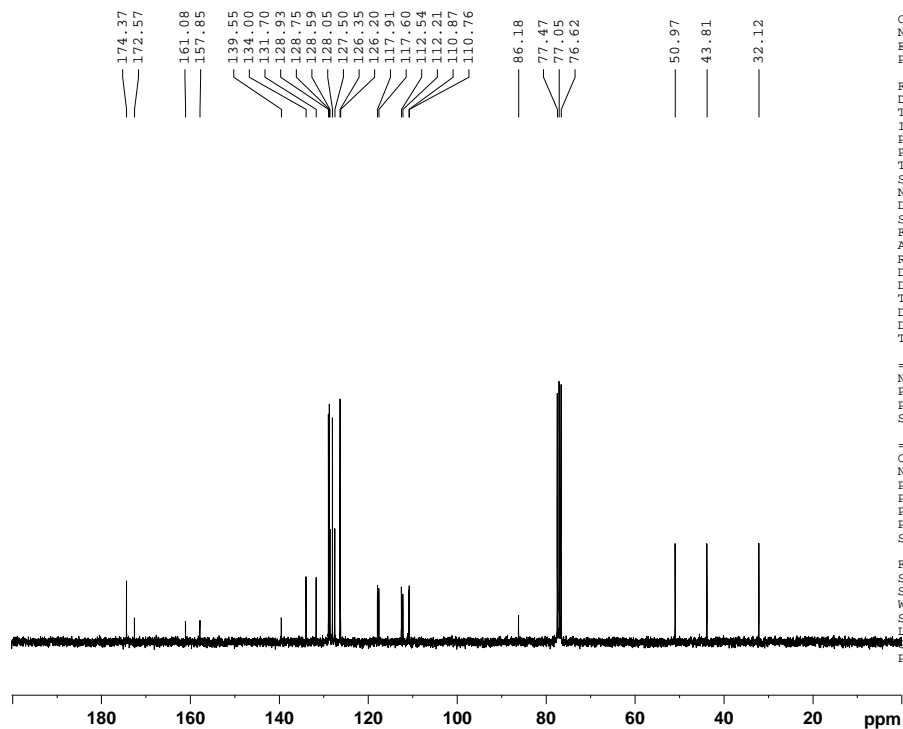

```
Current Data Parameters
NAME sunlh-407A
EXPNO 11
PROCNO 1

F2 - Acquisition Parameters
Date_ 20101227
Time 18.28
INSTRUM spect
PROBHD 5 mm DUL 13C-1
PULPROG zgpg30
TD 65536
SOLVENT CDCl3
NS 153
DS 4
SWH 17985.611 Hz
FIDRES 0.274439 Hz
AQ 1.8219508 sec
RG 6502
DW 27.800 usec
DE 8.00 usec
TE 297.2 K
D1 2.0000000 sec
D11 0.0300000 sec
TD0 1
```

```
===== CHANNEL f1 =====
NUC1 13C
P1 12.50 usec
PL1 2.00 dB
SFO1 75.4752953 MHz

===== CHANNEL f2 =====
CPDPRG2 waltz16
NUC2 1H
PCPD2 100.00 usec
PL2 3.00 dB
PL12 22.33 dB
PL13 23.00 dB
SFO2 300.1312005 MHz

F2 - Processing parameters
SI 32768
SF 75.4677490 MHz
WDW EM
SSB 0
LB 1.00 Hz
GB 0
PC 1.40
```

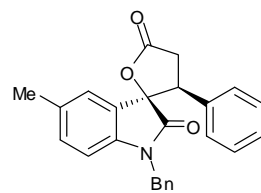

**3i**

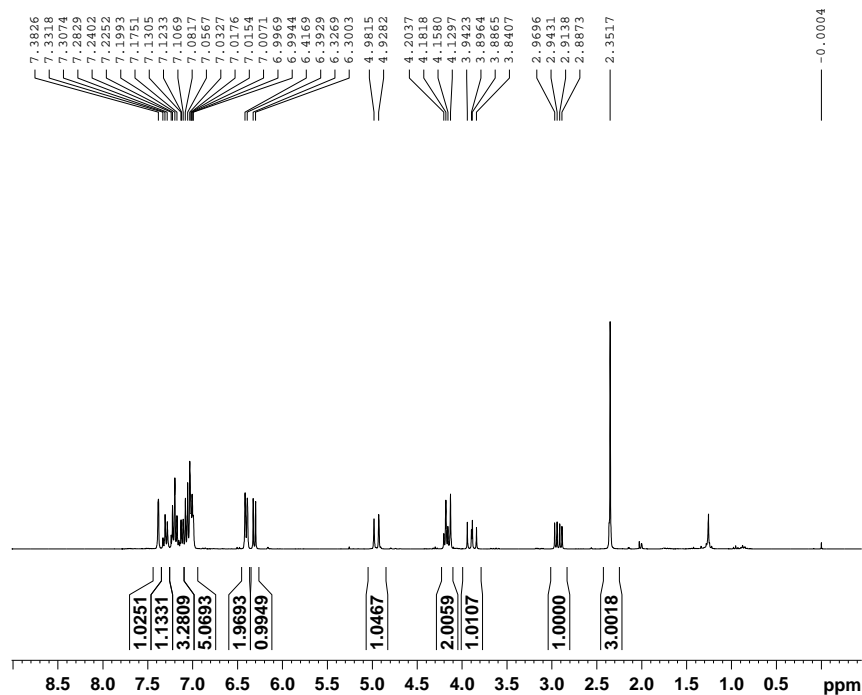

-0.0004

Current Data Parameters  
 NAME sunlh-424B  
 EXPNO 20  
 PROCNO 1

F2 - Acquisition Parameters  
 Date\_ 20110125  
 Time 8.55  
 INSTRUM spect  
 PROBHD 5 mm DUL 13C-1  
 PULPROG zg30  
 TD 65536  
 SOLVENT CDCl3  
 NS 11  
 DS 0  
 SWH 8992.806 Hz  
 FIDRES 0.137219 Hz  
 AQ 3.6438515 sec  
 RG 57  
 DW 55.600 usec  
 DE 8.00 usec  
 TE 295.1 K  
 D1 1.00000000 sec  
 TDO 1

===== CHANNEL f1 =====  
 NUC1 1H  
 P1 10.80 usec  
 PL1 3.00 dB  
 SFO1 300.1324010 MHz

F2 - Processing parameters  
 SI 32768  
 SF 300.1300117 MHz  
 WDW EM  
 SSB 0  
 LB 0.30 Hz  
 GB 0  
 PC 1.00

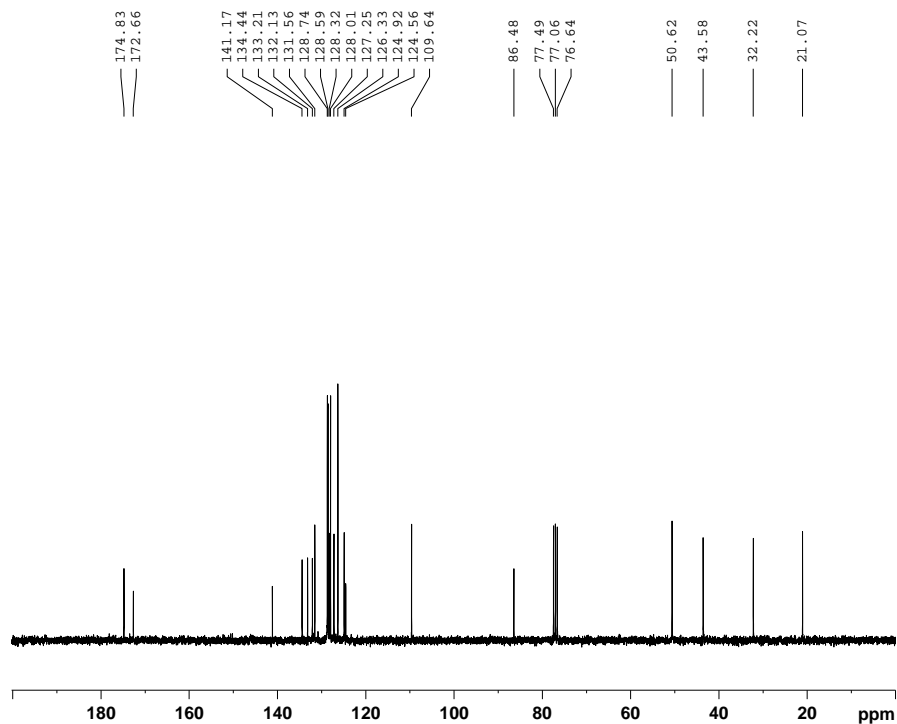

Current Data Parameters  
 NAME sunlh-424B  
 EXPNO 11  
 PROCNO 1

F2 - Acquisition Parameters  
 Date\_ 20110120  
 Time 17.44  
 INSTRUM spect  
 PROBHD 5 mm DUL 13C-1  
 PULPROG zgpg30  
 TD 65536  
 SOLVENT CDCl3  
 NS 45  
 DS 4  
 SWH 17985.611 Hz  
 FIDRES 0.274439 Hz  
 AQ 1.8219508 sec  
 RG 5792.6  
 DW 27.800 usec  
 DE 8.00 usec  
 TE 296.9 K  
 D1 2.00000000 sec  
 D11 0.03000000 sec  
 TDO 1

===== CHANNEL f1 =====  
 NUC1 13C  
 P1 12.50 usec  
 PL1 2.00 dB  
 SFO1 75.4752953 MHz

===== CHANNEL f2 =====  
 CPDPRG2 waltz16  
 NUC2 1H  
 PCPD2 100.00 usec  
 PL2 3.00 dB  
 PL12 22.33 dB  
 PL13 23.00 dB  
 SFO2 300.1312005 MHz

F2 - Processing parameters  
 SI 32768  
 SF 75.4677538 MHz  
 WDW EM  
 SSB 0  
 LB 1.00 Hz  
 GB 0  
 PC 1.40



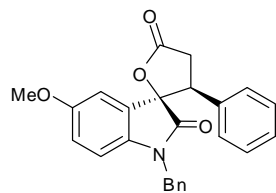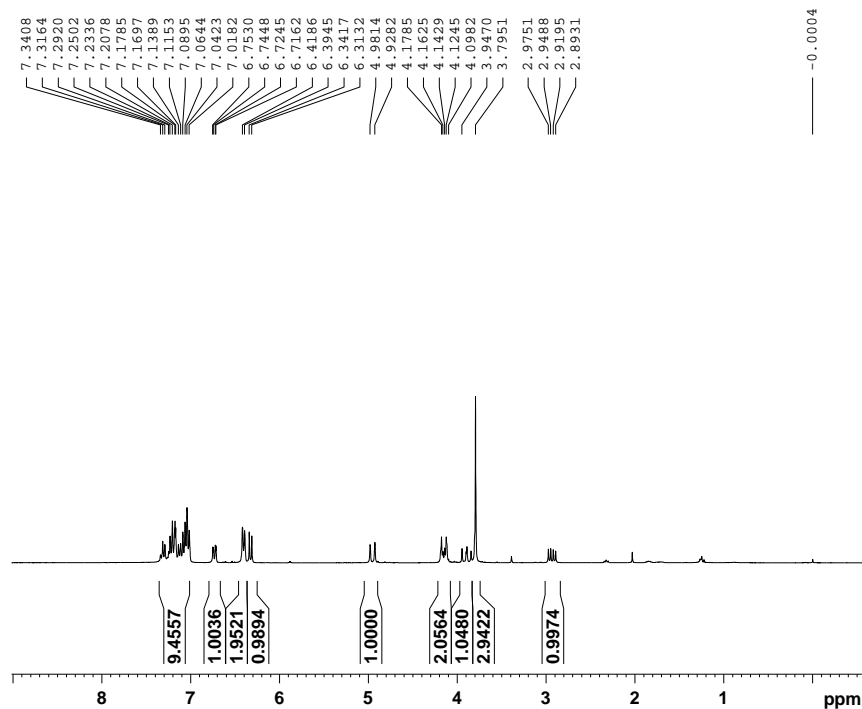

```

Current Data Parameters
NAME sunlh-425B
EXPNO 10
PROCNO 1

F2 - Acquisition Parameters
Date_ 20110121
Time 16.35
INSTRUM spect
PROBHD 5 mm DUL 13C-1
PULPROG zg30
TD 65536
SOLVENT CDCl3
NS 8
DS 0
SWH 8992.806 Hz
FIDRES 0.137219 Hz
AQ 3.6438515 sec
RG 128
DW 55.600 usec
DE 8.00 usec
TE 296.3 K
D1 1.00000000 sec
TD0 1

===== CHANNEL f1 =====
NUC1 1H
P1 10.80 usec
PL1 3.00 dB
SFO1 300.1324010 MHz

F2 - Processing parameters
SI 32768
SF 300.1300086 MHz
WDW EM
SSB 0
LB 0.30 Hz
GB 0
PC 1.00
    
```

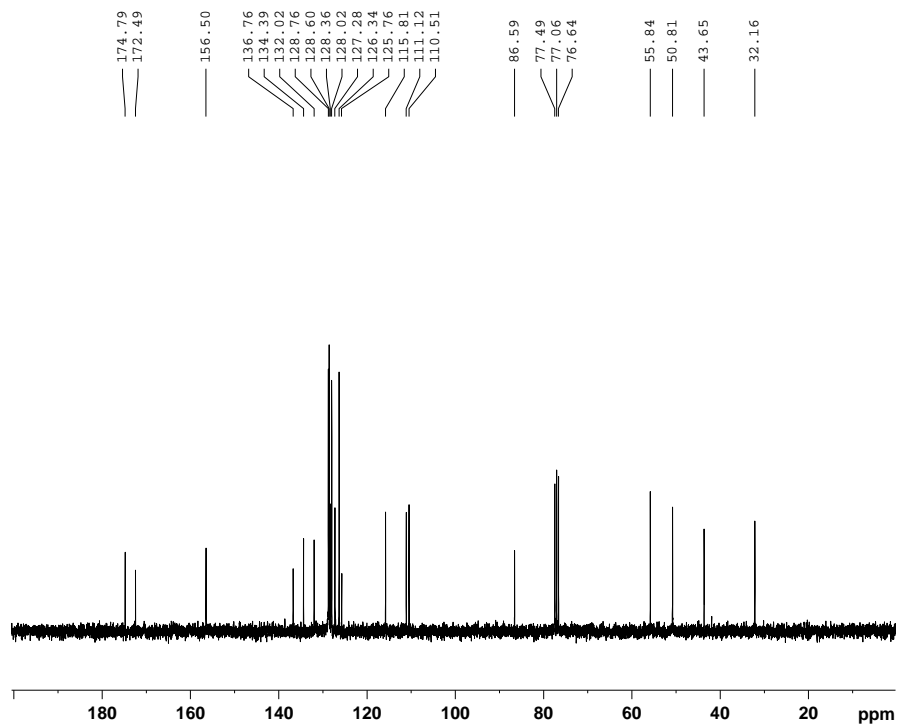

```

Current Data Parameters
NAME sunlh-425B
EXPNO 11
PROCNO 1

F2 - Acquisition Parameters
Date_ 20110121
Time 16.38
INSTRUM spect
PROBHD 5 mm DUL 13C-1
PULPROG zgpg30
TD 65536
SOLVENT CDCl3
NS 22
DS 4
SWH 17985.611 Hz
FIDRES 0.274439 Hz
AQ 1.8219508 sec
RG 4096
DW 27.800 usec
DE 8.00 usec
TE 296.6 K
D1 2.00000000 sec
D11 0.03000000 sec
TD0 1

===== CHANNEL f1 =====
NUC1 13C
P1 12.50 usec
PL1 2.00 dB
SFO1 75.4752953 MHz

===== CHANNEL f2 =====
CPDPRG2 waltz16
NUC2 1H
PCPD2 100.00 usec
PL2 3.00 dB
PL12 22.33 dB
PL13 23.00 dB
SFO2 300.1312005 MHz

F2 - Processing parameters
SI 32768
SF 75.4677537 MHz
WDW EM
SSB 0
LB 1.00 Hz
GB 0
PC 1.40
    
```

## Part III HPLC Spectra

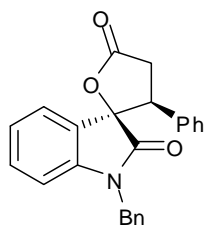

**3aa**

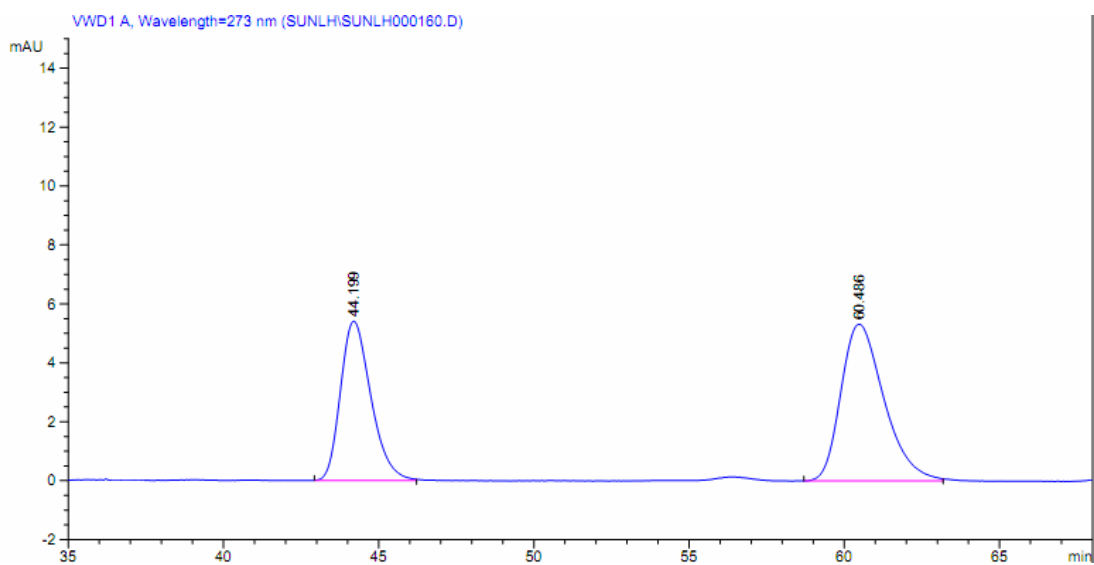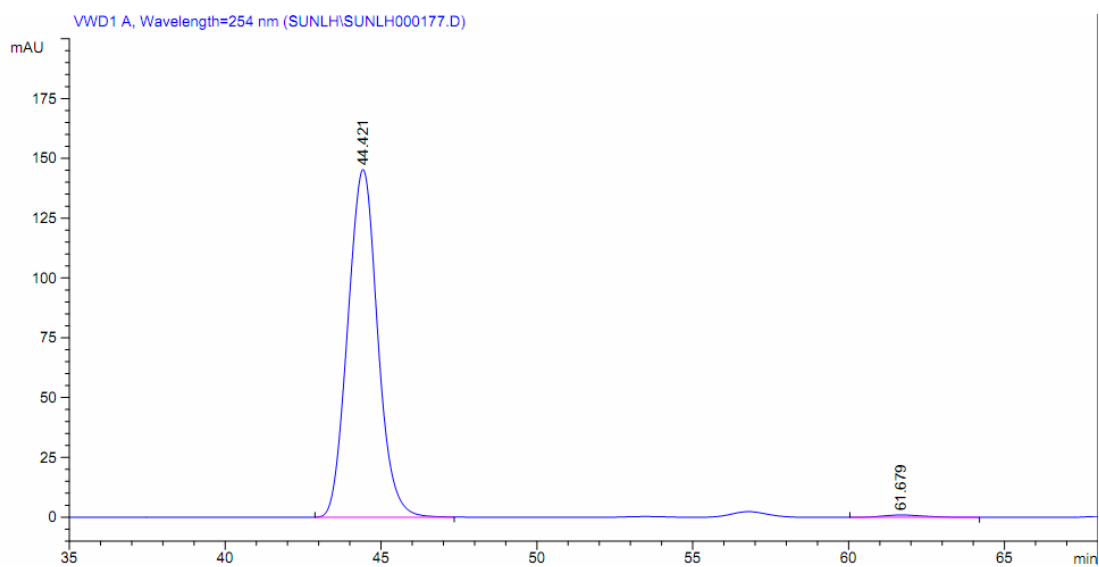

| Peak # | RetTime [min] | Type | Width [min] | Area mAU *s | Height [mAU] | Area %  |
|--------|---------------|------|-------------|-------------|--------------|---------|
| 1      | 44.421        | BB   | 1.0332      | 9677.83789  | 145.32806    | 99.0280 |
| 2      | 61.679        | BB   | 1.4734      | 94.98950    | 9.75888e-1   | 0.9720  |

Totals : 9772.82739 146.30395

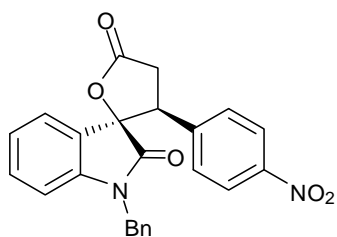

**3b**

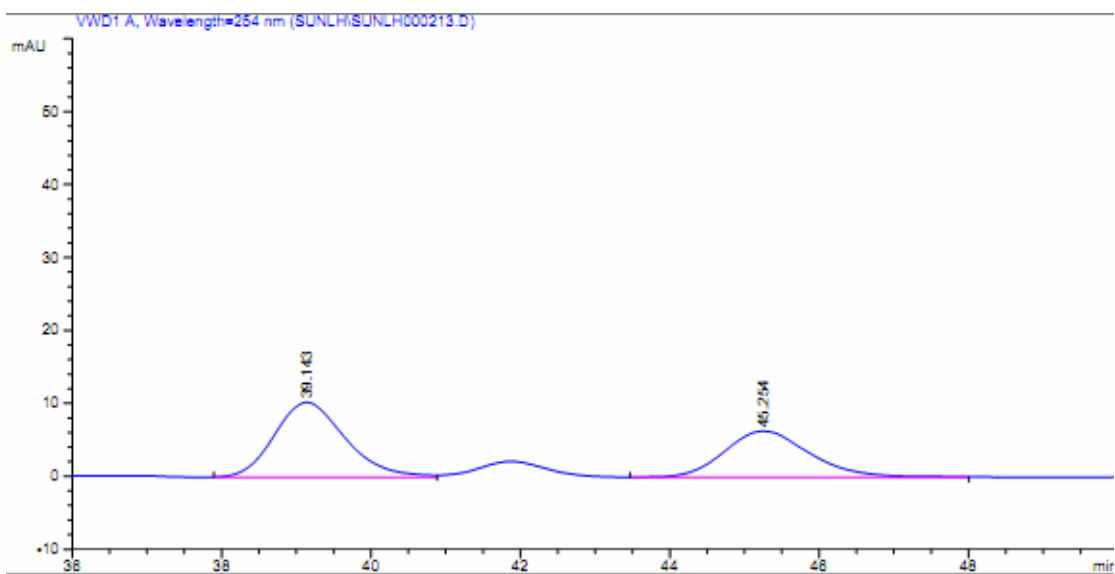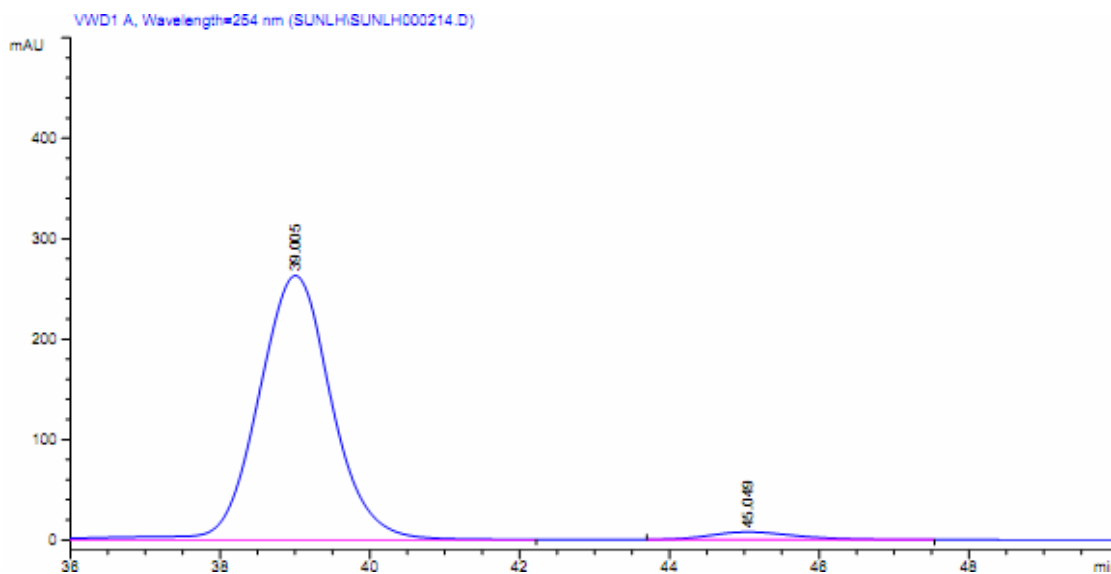

Signal 1: VWD1 A, Wavelength=254 nm

| Peak # | RetTime [min] | Type | Width [min] | Area mAU*s | Height [mAU] | Area %  |
|--------|---------------|------|-------------|------------|--------------|---------|
| 1      | 39.005        | BB   | 1.0513      | 1.79186e4  | 262.94363    | 96.5980 |
| 2      | 45.049        | BB   | 1.2232      | 631.06580  | 7.70679      | 3.4020  |

Totals : 1.85497e4 270.65043

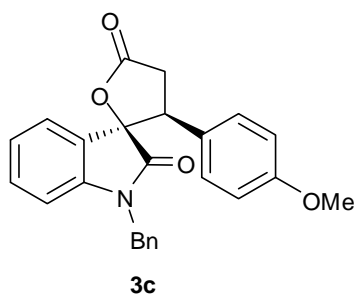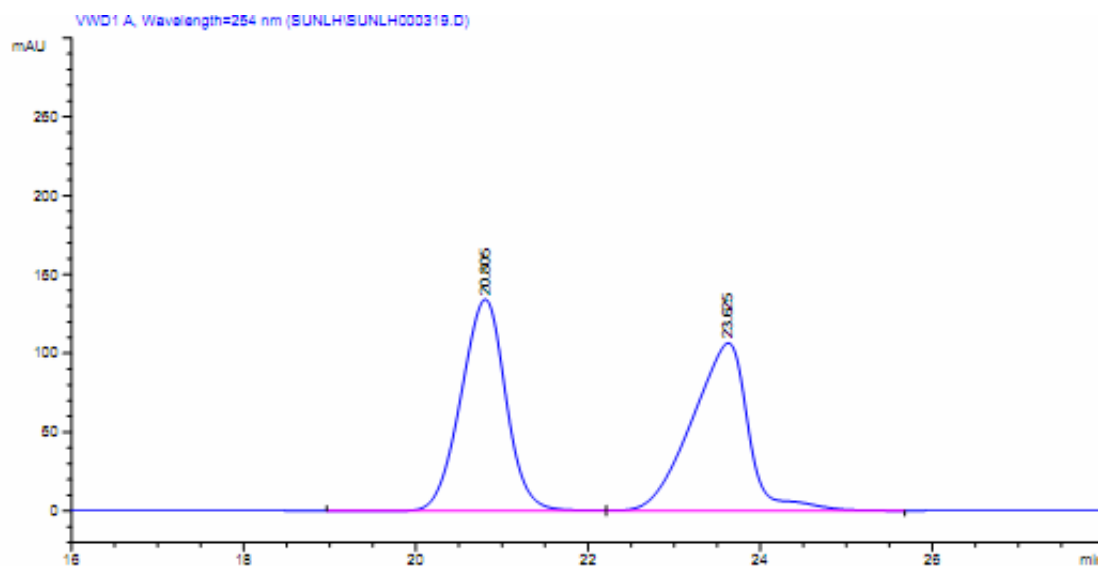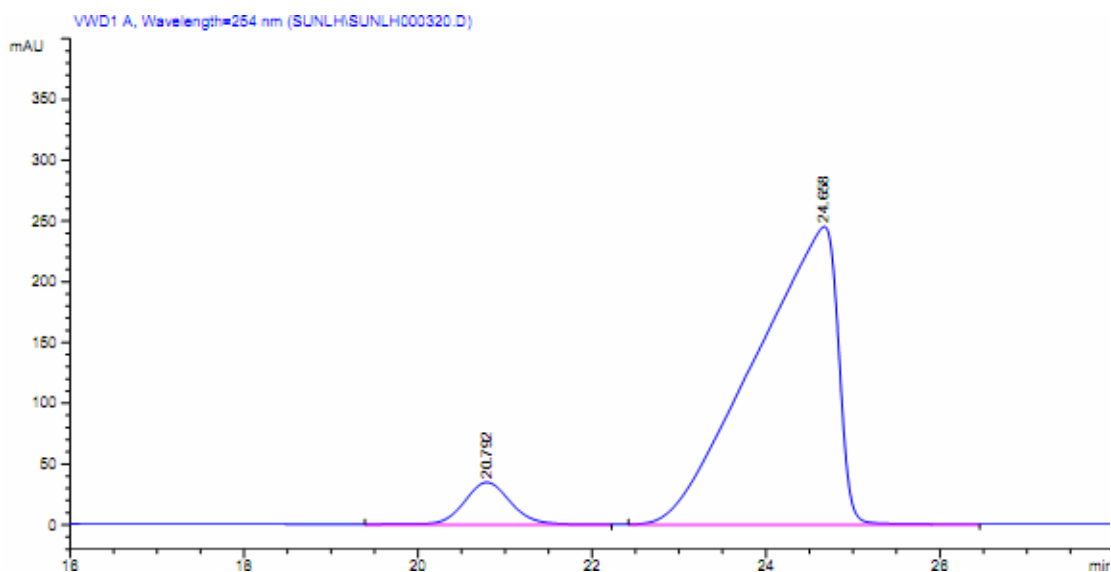

Signal 1: VWD1 A, Wavelength=254 nm

| Peak #   | RetTime [min] | Type | Width [min] | Area mAU *s | Height [mAU] | Area %  |
|----------|---------------|------|-------------|-------------|--------------|---------|
| 1        | 20.792        | BB   | 0.5803      | 1311.55823  | 34.73857     | 7.4535  |
| 2        | 24.658        | BB   | 0.9491      | 1.62849e4   | 245.34042    | 92.5465 |
| Totals : |               |      |             | 1.75965e4   | 280.07899    |         |

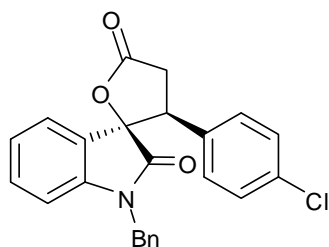

**3d**

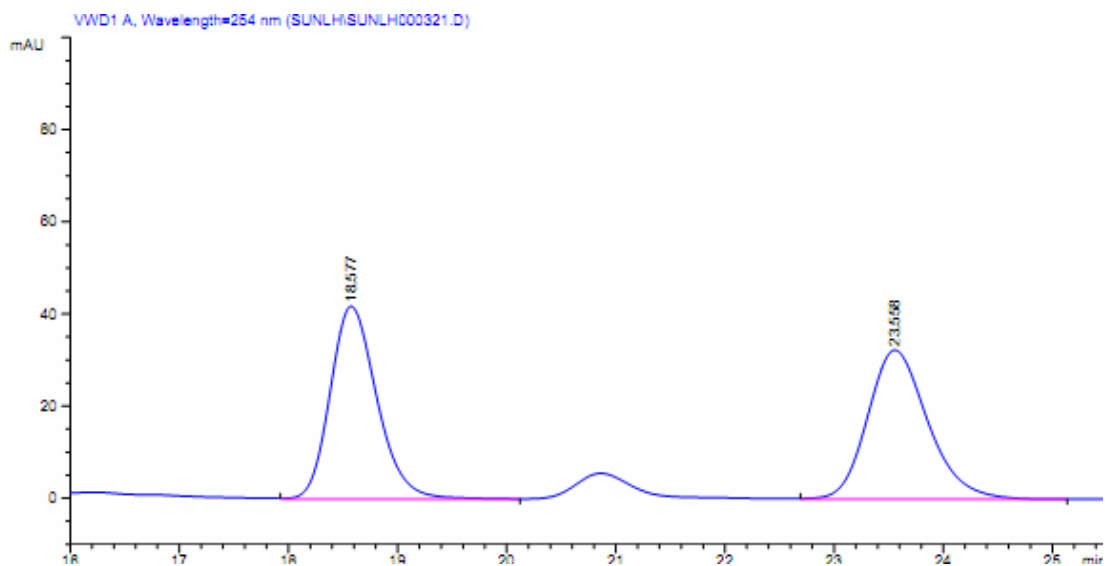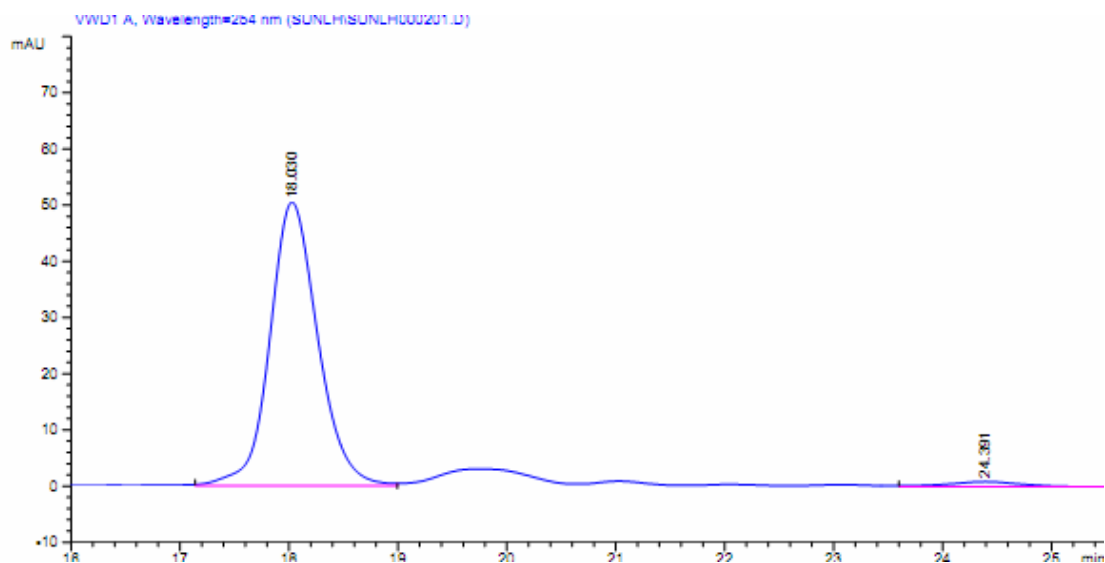

Signal 1: VWD1 A, Wavelength=254 nm

| Peak # | RetTime [min] | Type | Width [min] | Area mAU   | Area *s    | Height [mAU] | Area %  |
|--------|---------------|------|-------------|------------|------------|--------------|---------|
| 1      | 18.030        | BV   | 0.4632      | 1548.25806 | 50.39798   | 50.39798     | 97.5152 |
| 2      | 24.391        | VB   | 0.6828      | 39.45204   | 8.66138e-1 | 8.66138e-1   | 2.4848  |

Totals : 1587.71010 51.26412

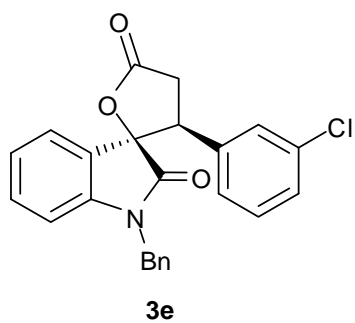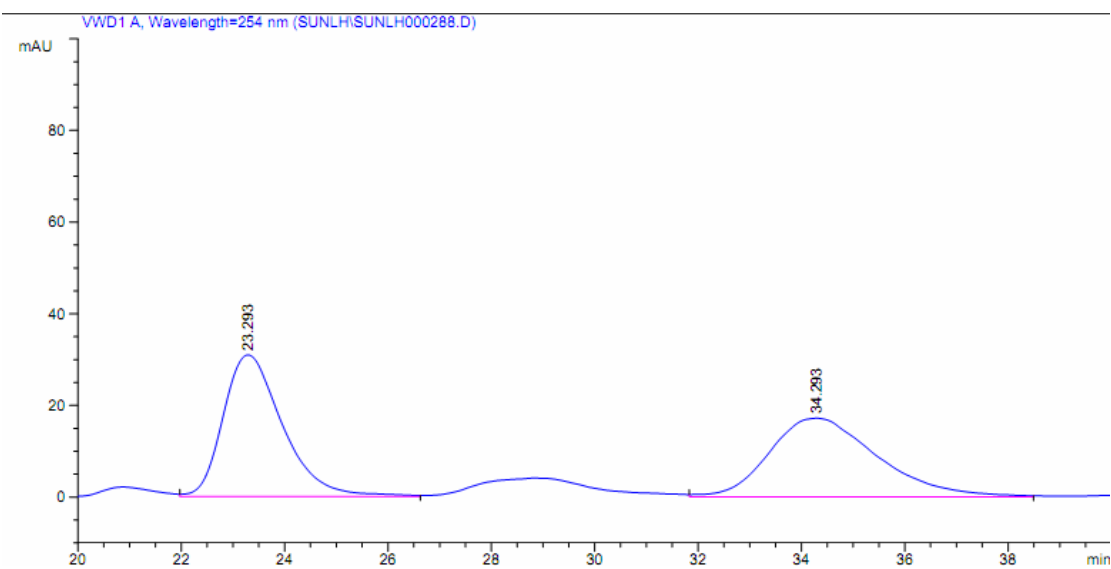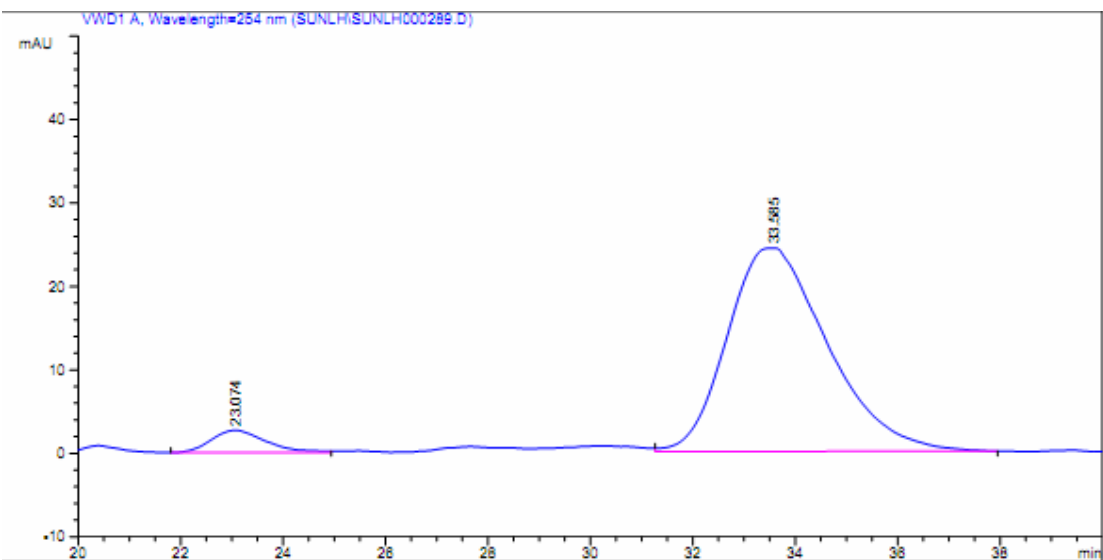

Signal 1: VWD1 A, Wavelength=254 nm

| Peak # | RetTime [min] | Type | Width [min] | Area mAU *s | Height [mAU] | Area %  |
|--------|---------------|------|-------------|-------------|--------------|---------|
| 1      | 23.074        | BB   | 1.1445      | 197.60316   | 2.66536      | 5.6110  |
| 2      | 33.585        | VB   | 1.6616      | 3324.12988  | 24.36519     | 94.3890 |

Totals : 3521.73305 27.03056

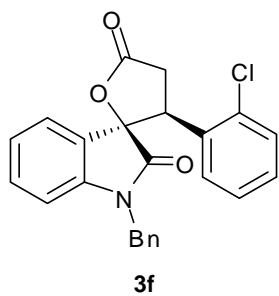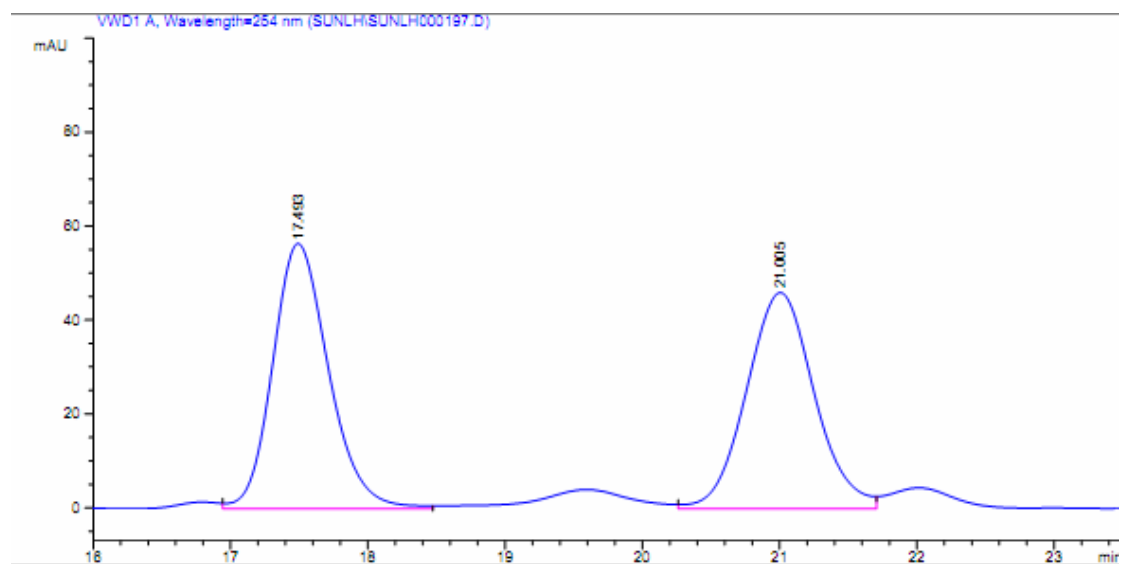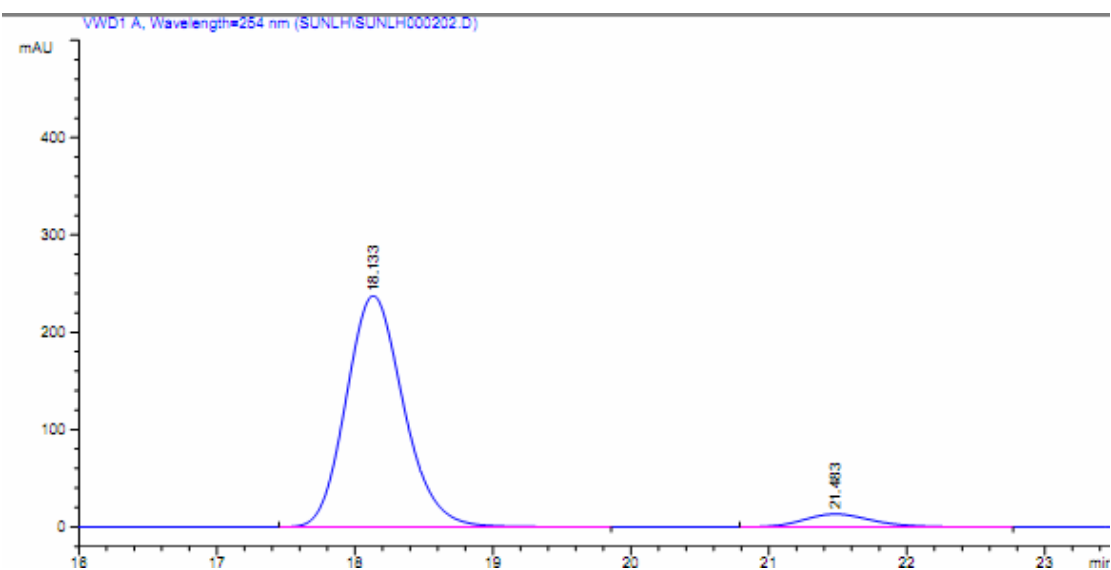

Signal 1: VWD1 A, Wavelength=254 nm

| Peak # | RetTime [min] | Type | Width [min] | Area mAU *s | Height [mAU] | Area %  |
|--------|---------------|------|-------------|-------------|--------------|---------|
| 1      | 18.133        | BB   | 0.4547      | 6880.00293  | 237.30621    | 93.6845 |
| 2      | 21.483        | BB   | 0.5348      | 463.79675   | 13.30462     | 6.3155  |

Totals : 7343.79968 250.61084

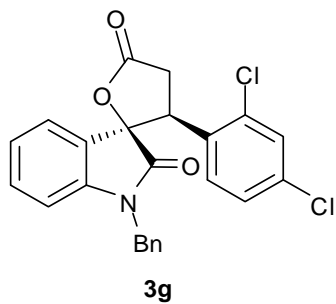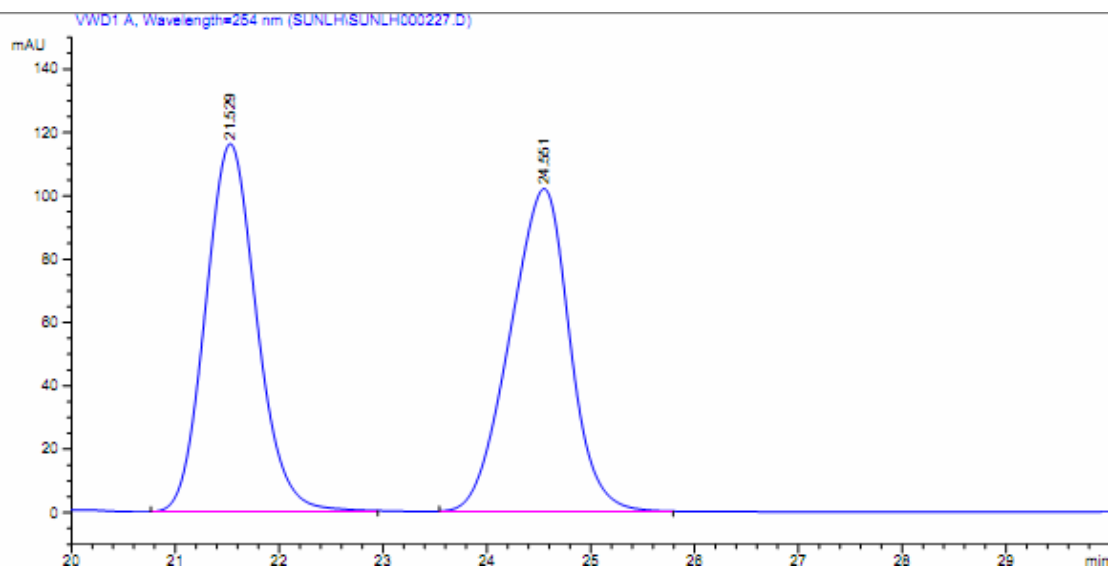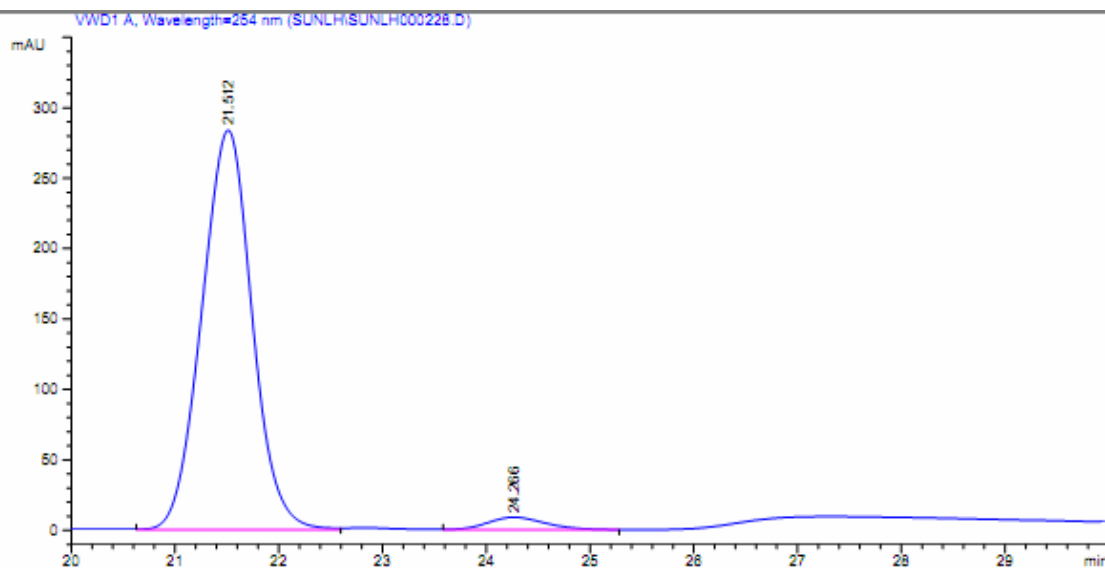

Signal 1: VWD1 A, Wavelength=254 nm

| Peak # | RetTime [min] | Type | Width [min] | Area mAU *s | Height [mAU] | Area %  |
|--------|---------------|------|-------------|-------------|--------------|---------|
| 1      | 21.512        | BB   | 0.5224      | 9549.57324  | 283.61209    | 96.5407 |
| 2      | 24.266        | BB   | 0.5934      | 342.18488   | 8.82822      | 3.4593  |

Totals : 9891.75812 292.44031



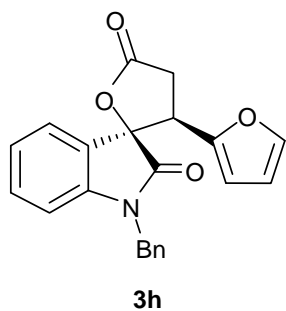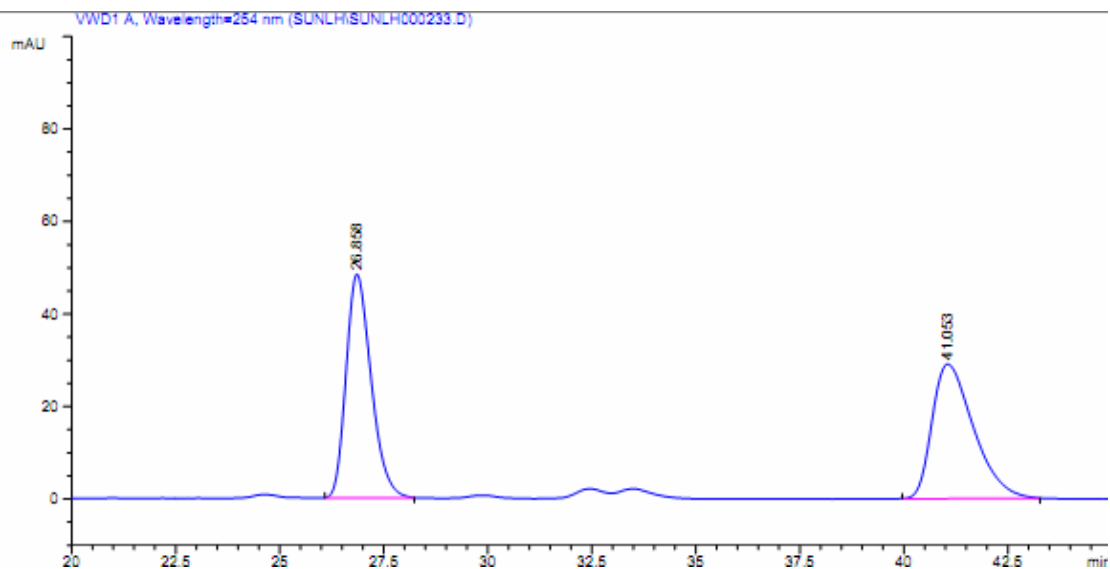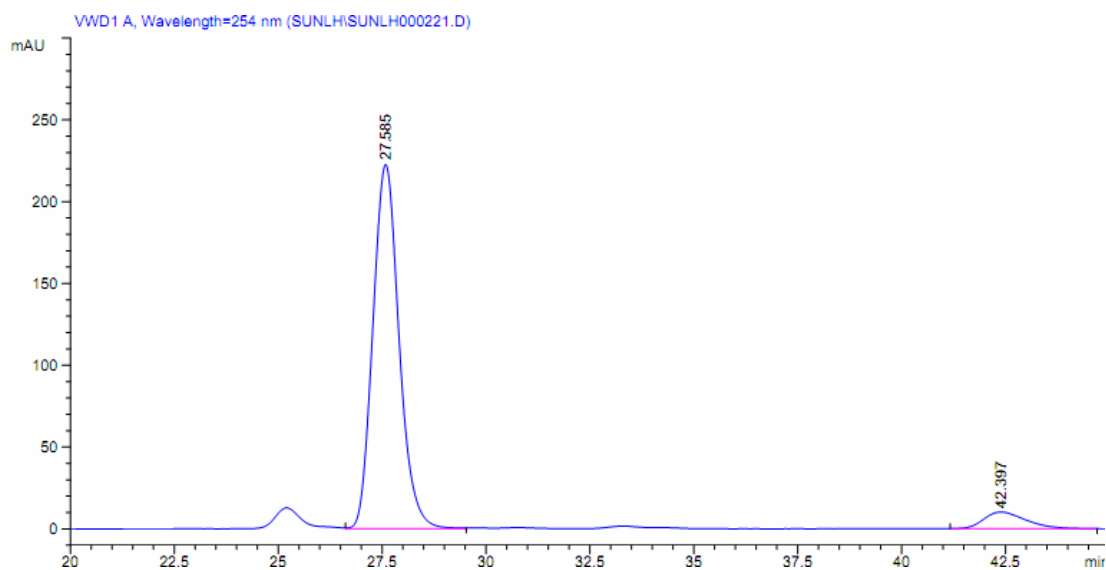

Signal 1: VWD1 A, Wavelength=254 nm

| Peak # | RetTime [min] | Type | Width [min] | Area mAU *s | Height [mAU] | Area %  |
|--------|---------------|------|-------------|-------------|--------------|---------|
| 1      | 27.585        | VB   | 0.6735      | 9736.73145  | 222.53751    | 93.1374 |
| 2      | 42.397        | BB   | 1.1013      | 717.43085   | 10.18578     | 6.8626  |

Totals : 1.04542e4 232.72328

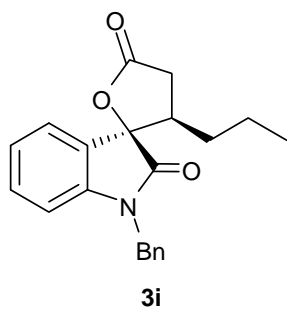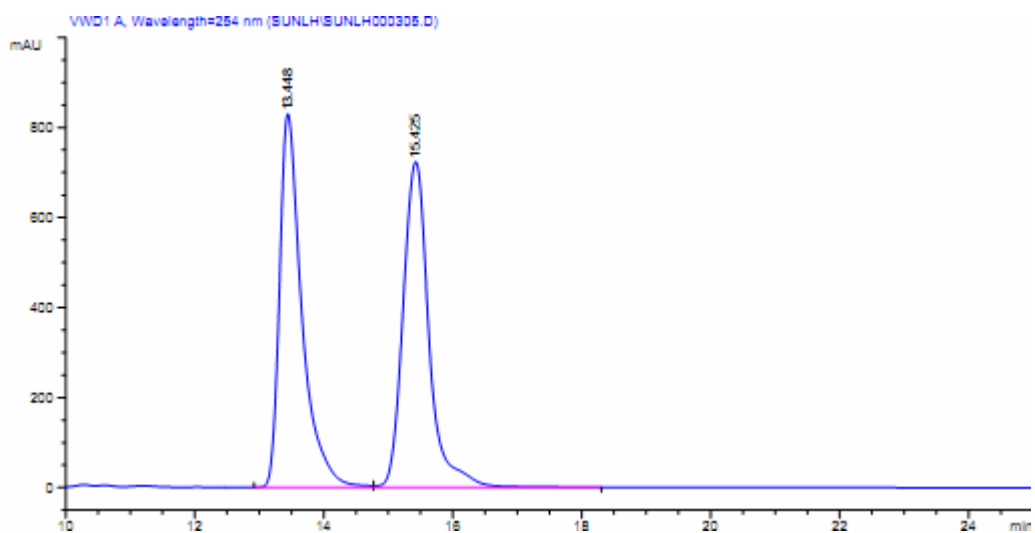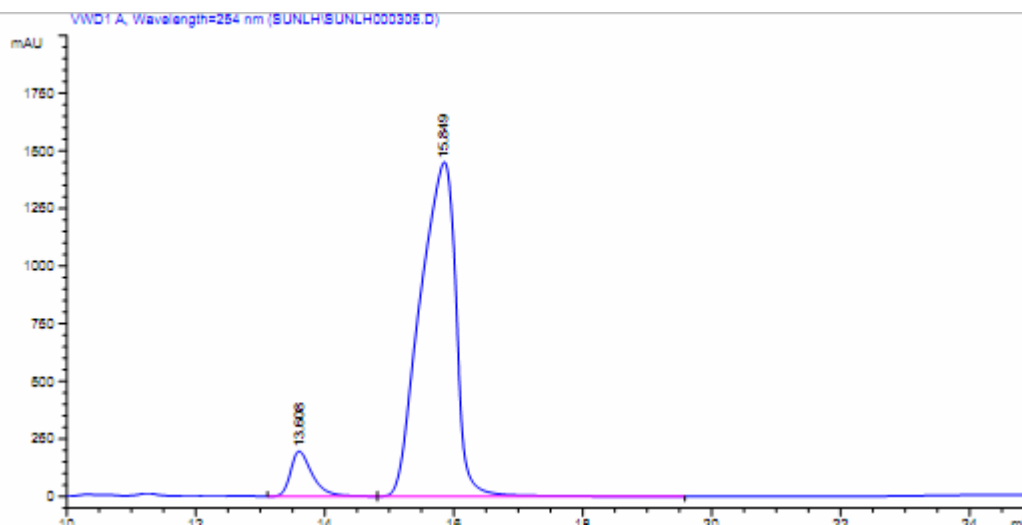

Signal 1: VWD1 A, Wavelength=254 nm

| Peak #   | RetTime [min] | Type | Width [min] | Area mAU *s | Height [mAU] | Area %  |
|----------|---------------|------|-------------|-------------|--------------|---------|
| 1        | 13.608        | VV   | 0.3588      | 4648.39307  | 195.62587    | 7.6922  |
| 2        | 15.849        | VB   | 0.6703      | 5.57815e4   | 1449.51282   | 92.3078 |
| Totals : |               |      |             | 6.04299e4   | 1645.13869   |         |

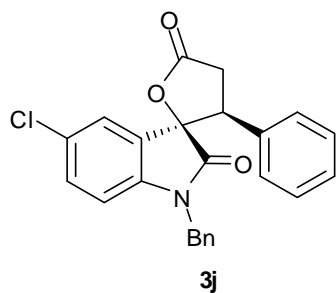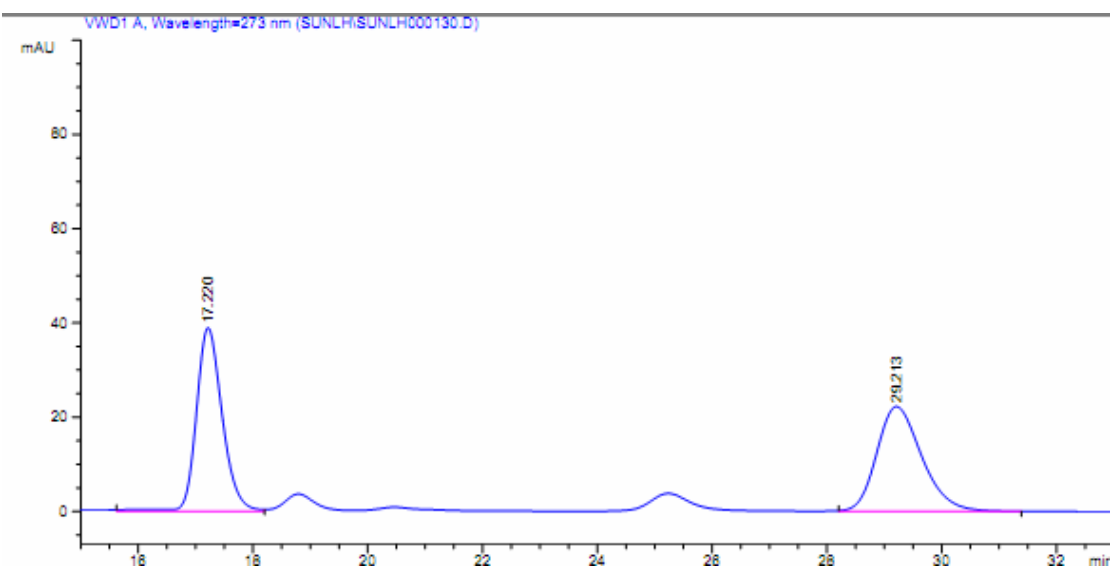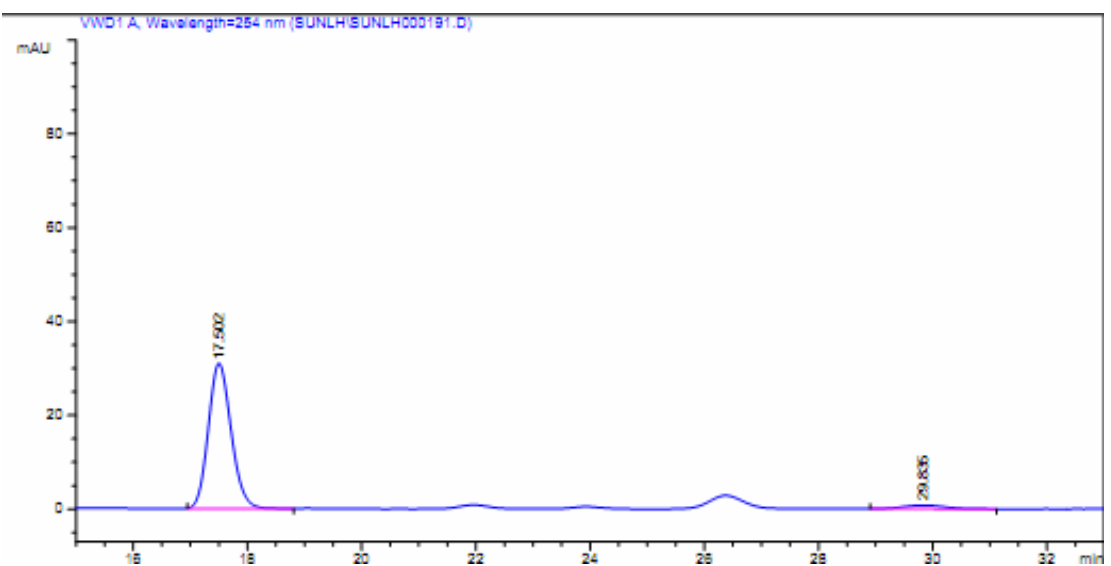

Signal 1: VWD1 A, Wavelength=254 nm

| Peak #   | RetTime [min] | Type | Width [min] | Area mAU  | Area %     | Height [mAU] | Area % |
|----------|---------------|------|-------------|-----------|------------|--------------|--------|
| 1        | 17.502        | BB   | 0.4290      | 959.75031 | 30.90669   | 95.6451      |        |
| 2        | 29.835        | BB   | 0.7529      | 39.10046  | 7.89934e-1 | 4.3549       |        |
| Totals : |               |      |             | 997.85076 |            | 31.69562     |        |

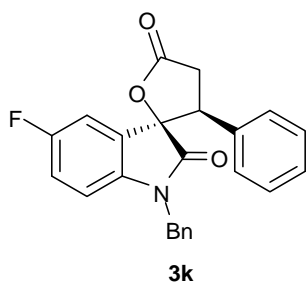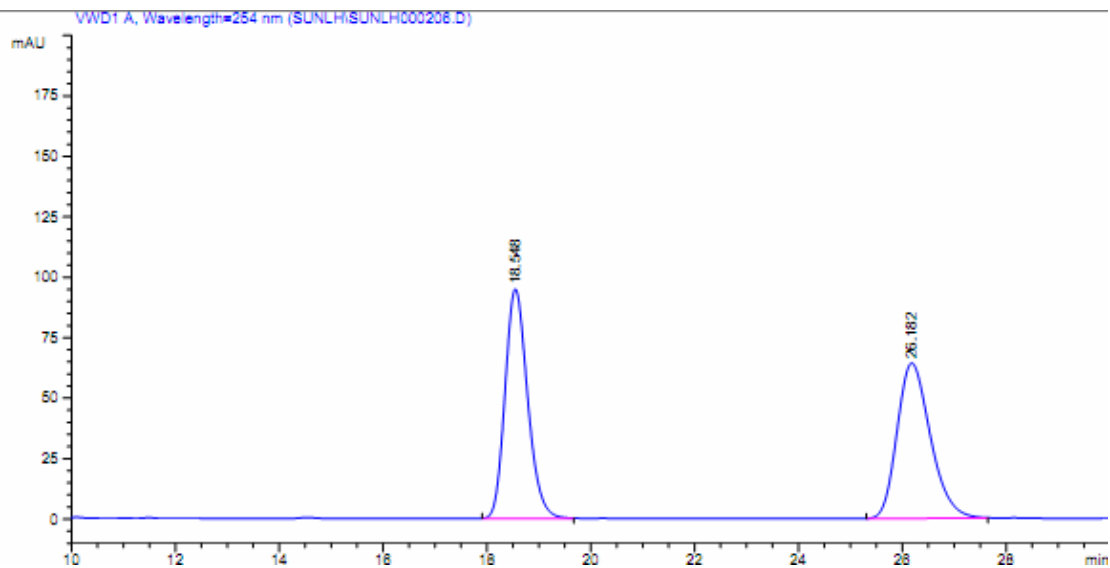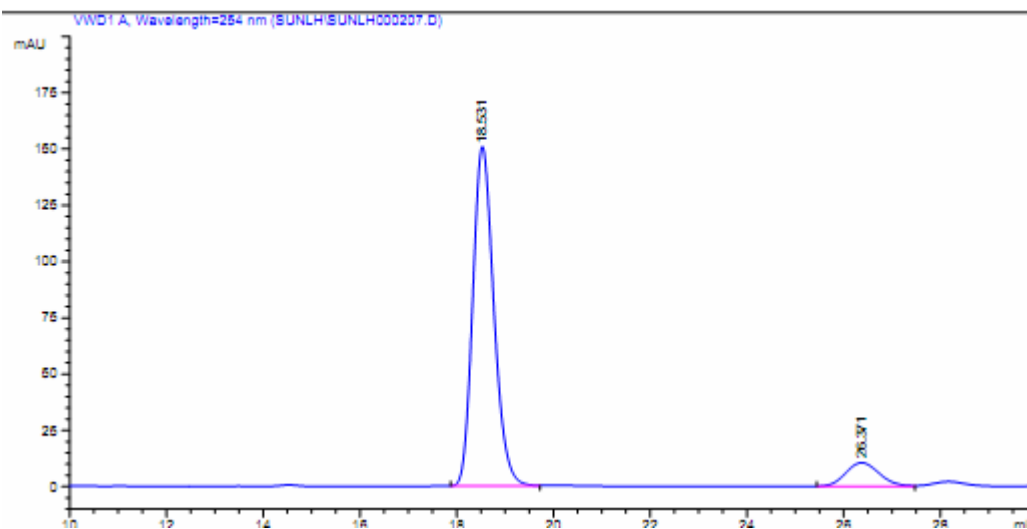

Signal 1: VWD1 A, Wavelength=254 nm

| Peak # | RetTime [min] | Type | Width [min] | Area mAU   | Area %  | Height [mAU] | Area %  |
|--------|---------------|------|-------------|------------|---------|--------------|---------|
| 1      | 18.531        | BB   | 0.4660      | 4555.57910 | 90.0141 | 150.79636    | 90.0141 |
| 2      | 26.371        | BV   | 0.7553      | 305.38345  | 9.9859  | 10.47154     | 9.9859  |

Totals : 5060.96255 161.26790

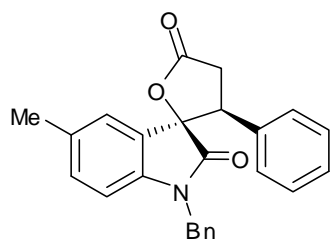

**3I**

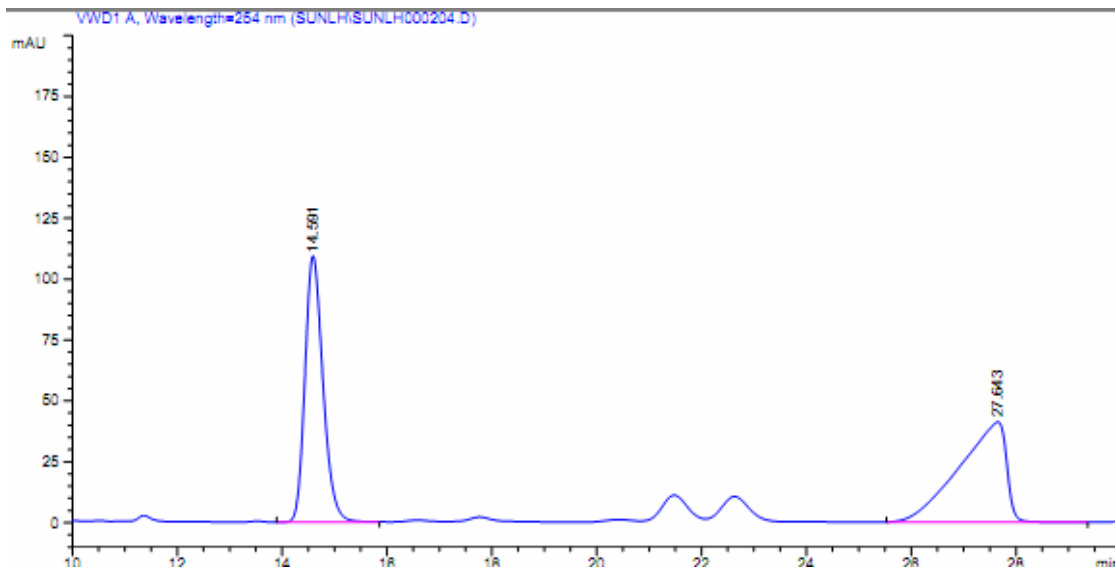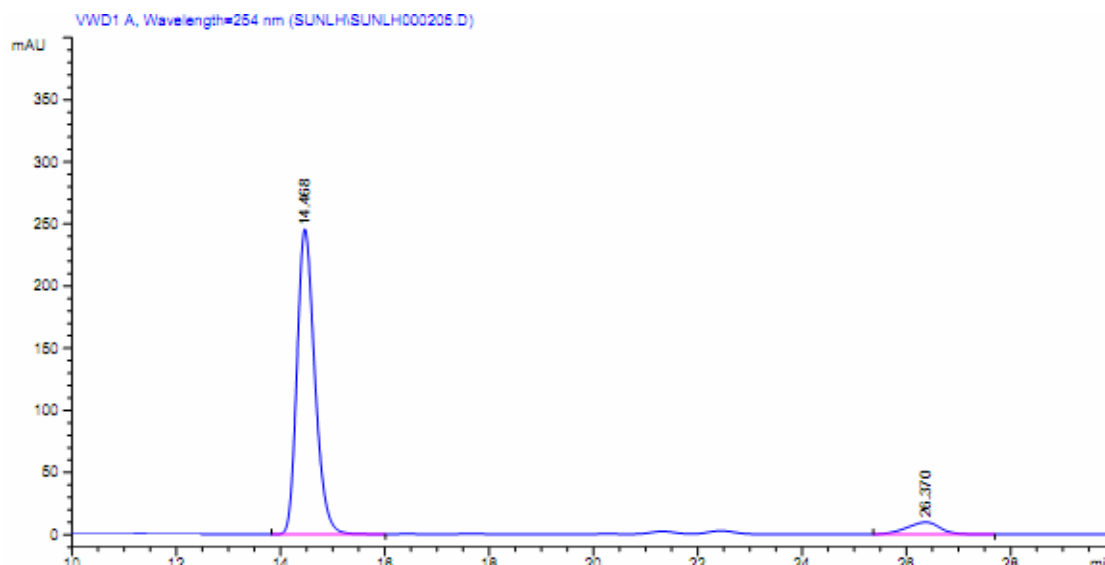

Signal 1: VWD1 A, Wavelength=254 nm

| Peak # | RetTime [min] | Type | Width [min] | Area mAU * s | Height [mAU] | Area %  |
|--------|---------------|------|-------------|--------------|--------------|---------|
| 1      | 14.468        | VB   | 0.3714      | 5844.22803   | 245.06833    | 93.0980 |
| 2      | 26.370        | BB   | 0.6938      | 433.26981    | 9.73868      | 6.9020  |

Totals : 6277.49783 254.80700
